# Supplementary material for: Lineage-Specific Proteomic Signatures in the Mycobacterium tuberculosis Complex Reveal Differential Abundance of Proteins Involved in Virulence, DNA Repair, CRISPR-Cas, Bioenergetics and Lipid Metabolism
Source: Front Microbiol. 2020 Sep 22;11:550760. doi: 10.3389/fmicb.2020.550760 (PMC7536270; doi:10.3389/fmicb.2020.550760)
Supplement: FILE S6 — Protein abundance comparison using Welch’s t-test between the MTBC lineages: Protein abundance comparison between lineages 4 and 7. [file Data_Sheet_6.xlsx]

## Sheet: Sheet2
Functional category	Welch's T-test significant	Cluster	Fold changes	Protein Ids	Gene Ids	RV number	Protein name	Peptides
cell wall and cell processes	L4_L7	Cluster -84	8.06682	P9WKL3	Rv0559c	Rv0559c	UncharacterizedproteinRv0559c	3			Summary of Welch's t test significant proteins (L4 vs L7) by functional category according to the Tuberculist database.
											Note: A total of 210 proteins out of the 230 significant were assigned to one of the protein functional category.
intermediary metabolism and respiration	L4_L7	Cluster 223	-239.191	O07717	aceAb	Rv1916	PutativeisocitratelyasesubunitB	29
conserved hypotheticals	L4_L7	Cluster 223	-172.559	O07748	Rv1883c	Rv1883c	Uncharacterizedprotein	6
intermediary metabolism and respiration	L4_L7	Cluster 223	-147.006	O07718	aceAa	Rv1915	PutativeisocitratelyasesubunitA	26
Regulatory proteins	L4_L7	Cluster 223	-107.585	O53720	Rv0386	Rv0386	Probabletranscriptionalregulatoryprotein(ProbablyLuxR/UhpA-family)	38
intermediary metabolism and respiration	L4_L7	Cluster 223	-67.6726	P95146	Rv1869c	Rv1869c	Probablereductase	24
conserved hypotheticals	L4_L7	Cluster 223	-51.823	P71784	Rv1505c	Rv1505c	Uncharacterizedprotein	10
	L4_L7	Cluster 223	-30.3516	P71629	cas10		CRISPR-associatedproteinCas10/Csm1	47
cell wall and cell processes	L4_L7	Cluster 223	-29.2972	O06342	Rv3479	Rv3479	UncharacterizedmembraneproteinRv3479	51
intermediary metabolism and respiration	L4_L7	Cluster 223	-27.9927	Q79FJ2	gnd1	Rv1844c	6-phosphogluconatedehydrogenase,decarboxylating	18
intermediary metabolism and respiration	L4_L7	Cluster 223	-25.2619	P9WNY1	Rv0458	Rv0458	Probablealdehydedehydrogenase	26
cell wall and cell processes	L4_L7	Cluster 223	-22.3703	P9WQK5	Rv0073	Rv0073	UncharacterizedABCtransporterATP-bindingproteinRv0073	12
conserved hypotheticals	L4_L7	Cluster 223	-21.1878	P9WML1	Rv1262c	Rv1262c	UncharacterizedHIT-likeproteinRv1262c	8
intermediary metabolism and respiration	L4_L7	Cluster 223	-14.2254	O53667	Rv0245	Rv0245	Possibleoxidoreductase	8
intermediary metabolism and respiration	L4_L7	Cluster 223	-12.7543	I6YEB6	Rv2766c	Rv2766c	Probableshort-chaintypedehydrogenase/reductase	16
intermediary metabolism and respiration	L4_L7	Cluster 223	-12.1564	P9WH09	rmlD	Rv3266c	dTDP-4-dehydrorhamnosereductase	13
virulence, detoxification and adaptation	L4_L7	Cluster 223	-11.4514	O53673	hsp	Rv0251c	HeatshockproteinHsp(Heat-stress-inducedribosome-bindingproteinA)	12
cell wall and cell processes	L4_L7	Cluster 223	-10.9978	P9WLQ7	Rv1841c	Rv1841c	UncharacterizedproteinRv1841c	10
conserved hypotheticals	L4_L7	Cluster 223	-10.5657	O06799	Rv1766	Rv1766	Conservedprotein	6
intermediary metabolism and respiration	L4_L7	Cluster 223	-10.2629	P9WGR7	Rv0945	Rv0945	UncharacterizedoxidoreductaseRv0945	12
intermediary metabolism and respiration	L4_L7	Cluster 223	-10.1109	O06813	opcA	Rv1446c	PutativeOXPPcycleproteinOpcA	20	Cluster 223 (N=60)
conserved hypotheticals	L4_L7	Cluster 223	-10.0404	P9WJA3	hrp1	Rv2626c	Hypoxicresponseprotein1	7
information pathways	L4_L7	Cluster 223	-9.89205	P9WH73	nrdF1	Rv1981c	Ribonucleoside-diphosphatereductasesubunitbetanrdF1	16
conserved hypotheticals	L4_L7	Cluster 223	-9.40671	P71794	Rv1515c	Rv1515c	Uncharacterizedprotein	13
cell wall and cell processes	L4_L7	Cluster 223	-9.26679	P9WFL5	Rv0064	Rv0064	UPF0182proteinRv0064	18
intermediary metabolism and respiration	L4_L7	Cluster 223	-8.97505	O53639	oxcA	Rv0118c	Probableoxalyl-CoAdecarboxylaseOxcA	23
intermediary metabolism and respiration	L4_L7	Cluster 223	-8.97225	P9WN73	zwf2	Rv1447c	Glucose-6-phosphate1-dehydrogenase2	23
intermediary metabolism and respiration	L4_L7	Cluster 223	-8.91534	O69692	Rv3725	Rv3725	Possibleoxidoreductase	11
intermediary metabolism and respiration	L4_L7	Cluster 223	-8.10521	P71552	Rv0958	Rv0958	Possiblemagnesiumchelatase	20
lipid metabolism	L4_L7	Cluster 223	-7.50749	O50402	echA18	Rv3373	Probableenoyl-CoAhydrataseEchA18(Enoylhydrase)(Unsaturatedacyl-CoAhydratase)(Crotonase)	9
conserved hypotheticals	L4_L7	Cluster 223	-6.50627	P71839	Rv0786c	Rv0786c	Conservedprotein	5
conserved hypotheticals	L4_L7	Cluster 223	-5.47777	P9WLM1	Rv2030c	Rv2030c	UncharacterizedproteinRv2030c	25
lipid metabolism	L4_L7	Cluster 223	-5.39028	O86319	fadE13	Rv0975c	Probableacyl-CoAdehydrogenaseFadE13	9
Regulatory proteins	L4_L7	Cluster 223	-5.35457	L7N6A2	Rv0275c	Rv0275c	Possibletranscriptionalregulatoryprotein(PossiblyTetR-family)	12
intermediary metabolism and respiration	L4_L7	Cluster 223	-5.02154	O86374	pmmA	Rv3257c	ProbablephosphomannomutasePmmA(PMM)(Phosphomannosemutase)	17
intermediary metabolism and respiration	L4_L7	Cluster 223	-4.97229	I6XES4	Rv2622	Rv2622	Possiblemethyltransferase(Methylase)	14
cell wall and cell processes	L4_L7	Cluster 223	-4.94544	P9WFP3	Rv1842c	Rv1842c	UPF0053proteinRv1842c	10
conserved hypotheticals	L4_L7	Cluster 223	-4.88314	V5QPR5	Rv0530A	Rv0530A	Conservedprotein	2
cell wall and cell processes	L4_L7	Cluster 223	-4.80415	P9WFP1	Rv2366c	Rv2366c	UPF0053proteinRv2366c	9
conserved hypotheticals	L4_L7	Cluster 223	-4.74843	O53494	Rv2052c	Rv2052c	Conservedprotein	15
conserved hypotheticals	L4_L7	Cluster 223	-4.70492	P9WL63	Rv2629	Rv2629	UncharacterizedproteinRv2629	16
lipid metabolism	L4_L7	Cluster 223	-4.67307	P9WKB3	Rv2484c	Rv2484c	PutativediacyglycerolO-acyltransferaseRv2484c	20
virulence, detoxification and adaptation	L4_L7	Cluster 223	-4.5647	P9WMK1	hspX	Rv2031c	Alpha-crystallin	10
cell wall and cell processes	L4_L7	Cluster 223	-4.48749	P9WQL7	Rv2688c	Rv2688c	FluoroquinolonesexportATP-bindingproteinRv2688c	13
intermediary metabolism and respiration	L4_L7	Cluster 223	-4.13747	I6Y4U4	Rv0794c	Rv0794c	Probableoxidoreductase	27
virulence, detoxification and adaptation	L4_L7	Cluster 223	-4.11365	P9WLN1	Rv2005c	Rv2005c	UniversalstressproteinRv2005c	8
conserved hypotheticals	L4_L7	Cluster 223	-4.08875	P9WQ27	Rv3031	Rv3031	Probable1,4-alpha-glucanbranchingenzymeRv3031	9
	L4_L7	Cluster 223	-4.0338	P9WIA3	Rv2368c		PhoH-likeprotein	10
cell wall and cell processes	L4_L7	Cluster 223	-3.95479	O33332	ltp1	Rv2790c	Probablelipid-transferproteinLtp1	15
lipid metabolism	L4_L7	Cluster 223	-3.82203	I6XFA9	fadE21	Rv2789c	Probableacyl-CoAdehydrogenaseFadE21	20
conserved hypotheticals	L4_L7	Cluster 223	-3.77456	O07751	Rv1879	Rv1879	Uncharacterizedprotein	9
intermediary metabolism and respiration	L4_L7	Cluster 223	-3.73876	O53620	Rv0075	Rv0075	Probableaminotransferase	18
conserved hypotheticals	L4_L7	Cluster 223	-3.66387	O69700	Rv3733c	Rv3733c	Uncharacterizedprotein	9
conserved hypotheticals	L4_L7	Cluster 223	-3.63295	I6Y9E8	Rv2475c	Rv2475c	Conservedprotein	5
intermediary metabolism and respiration	L4_L7	Cluster 223	-3.53605	O53547	Rv3502c	Rv3502c	Probableshort-chaintypedehydrogenase/reductase.Possible17-beta-hydroxysteroiddehydrogenase	11
cell wall and cell processes	L4_L7	Cluster 223	-3.38018	P9WIP9	hbhA	Rv0475	Heparin-bindinghemagglutinin	17
intermediary metabolism and respiration	L4_L7	Cluster 223	-3.34051	P9WHS7	pepE	Rv2089c	ProbabledipeptidasePepE	8
conserved hypotheticals	L4_L7	Cluster 223	-3.18457	O07738	Rv1894c	Rv1894c	Uncharacterizedprotein	13
conserved hypotheticals	L4_L7	Cluster 223	-3.12583	P9WP11	Rv1558	Rv1558	F420H(2)-dependentquinonereductaseRv1558	12
conserved hypotheticals	L4_L7	Cluster 223	-3.12358	P9WFM7	Rv2908c	Rv2908c	UPF0109proteinRv2908c	7
intermediary metabolism and respiration	L4_L7	Cluster 223	-2.95761	O06574	gnd2	Rv1122	Probable6-phosphogluconatedehydrogenase,decarboxylatingGnd2	18
	L4_L7	Cluster 222	-34.9439	P9WPC7	Rv2667		UncharacterizedproteinRv2667	14
virulence, detoxification and adaptation	L4_L7	Cluster 222	-15.7165	P9WF69	vapC33	Rv1242	RibonucleaseVapC33	8
lipid metabolism	L4_L7	Cluster 222	-15.053	O07721	fadB5	Rv1912c	PossibleoxidoreductaseFadB5	17
intermediary metabolism and respiration	L4_L7	Cluster 222	-10.2935	I6Y9Q3	prpC	Rv1131	2-methylcitratesynthase	17	Cluster 222 (N= 32)
cell wall and cell processes	L4_L7	Cluster 222	-9.74897	O07432	Rv0188	Rv0188	Probableconservedtransmembraneprotein	2
cell wall and cell processes	L4_L7	Cluster 222	-9.46872	O53925	Rv1678	Rv1678	Probableintegralmembraneprotein	6
lipid metabolism	L4_L7	Cluster 222	-9.39459	O53926	fadE16	Rv1679	Possibleacyl-CoAdehydrogenaseFadE16	17
virulence, detoxification and adaptation	L4_L7	Cluster 222	-9.28647	O50456	vapB33	Rv1241	AntitoxinVapB33	9
conserved hypotheticals	L4_L7	Cluster 222	-8.42216	P9WLA5	Rv2557	Rv2557	UncharacterizedproteinRv2557	14
conserved hypotheticals	L4_L7	Cluster 222	-8.3568	O53404	Rv1056	Rv1056	Conservedprotein	15
	L4_L7	Cluster 222	-7.73623	P9WJF7	csm4		CRISPRtypeIII-associatedRAMPproteinCsm4	11
conserved hypotheticals	L4_L7	Cluster 222	-6.29092	O33182	Rv1680	Rv1680	Uncharacterizedprotein	20
lipid metabolism	L4_L7	Cluster 222	-6.11164	P9WNN7	echA12	Rv1472	Probableenoyl-CoAhydrataseechA12	14
conserved hypotheticals	L4_L7	Cluster 222	-6.06018	O53744	Rv0459	Rv0459	Uncharacterizedprotein	7
	L4_L7	Cluster 222	-5.53537	P9WJF9	csm3		CRISPRtypeIII-associatedRAMPproteinCsm3	10
virulence, detoxification and adaptation	L4_L7	Cluster 222	-5.27946	P9WMJ3	virS	Rv3082c	HTH-typetranscriptionalregulatorVirS	11
cell wall and cell processes	L4_L7	Cluster 222	-5.20858	P9WJE1	espA	Rv3616c	ESX-1secretion-associatedproteinEspA	14
virulence, detoxification and adaptation	L4_L7	Cluster 222	-5.01597	P9WI99	Rv3168	Rv3168	Putativeaminoglycosidephosphotransferase	17
conserved hypotheticals	L4_L7	Cluster 222	-4.8317	O50435	Rv1179c	Rv1179c	Uncharacterizedprotein	41
conserved hypotheticals	L4_L7	Cluster 222	-4.69482	O53319	Rv3169	Rv3169	Conservedprotein	24
cell wall and cell processes	L4_L7	Cluster 222	-4.50576	P9WJD7	espC	Rv3615c	ESX-1secretion-associatedproteinEspC	6
conserved hypotheticals	L4_L7	Cluster 222	-4.45359	P95144	Rv1871c	Rv1871c	Conservedprotein	7
information pathways	L4_L7	Cluster 222	-4.39685	P9WH05	deaD	Rv1253	ATP-dependentRNAhelicaseDeaD	17
intermediary metabolism and respiration	L4_L7	Cluster 222	-4.10258	O06582	prpD	Rv1130	2-methylcitratedehydratase	27
intermediary metabolism and respiration	L4_L7	Cluster 222	-3.82715	P95059	atsA	Rv0711	PossiblearylsulfataseAtsA(Aryl-sulfatesulphohydrolase)(Arylsulphatase)	20
conserved hypotheticals	L4_L7	Cluster 222	-3.81193	I6XHG6	Rv3527	Rv3527	Uncharacterizedprotein	7
intermediary metabolism and respiration	L4_L7	Cluster 222	-3.73897	I6Y2E2	Rv3049c	Rv3049c	Probablemonooxygenase	27
intermediary metabolism and respiration	L4_L7	Cluster 222	-3.72642	P9WQC1	adhA	Rv1862	ProbablealcoholdehydrogenaseAdhA	14
intermediary metabolism and respiration	L4_L7	Cluster 222	-3.68315	P9WN89	frdB	Rv1553	Fumaratereductaseiron-sulfursubunit	16
cell wall and cell processes	L4_L7	Cluster 222	-3.682	O05883	Rv3238c	Rv3238c	Probableconservedintegralmembraneprotein	4
	L4_L7	Cluster 222	-3.37073	P9WND5	lldD		PutativeL-lactatedehydrogenase	33
lipid metabolism	L4_L7	Cluster 222	-3.18811	I6YDI9	plsC	Rv2483c	Uncharacterizedprotein	21
	L4_L7	Cluster 221	2.90001	P9WQK9	pstB2		PhosphateimportATP-bindingproteinPstB2	15
intermediary metabolism and respiration	L4_L7	Cluster 221	3.19085	P9WPN9	cyp126	Rv0778	PutativecytochromeP450126	14
conserved hypotheticals	L4_L7	Cluster 221	3.28907	O53538	Rv2264c	Rv2264c	Conservedhypotheticalprolinerichprotein	12	Cluster 221 (N= 91)
lipid metabolism	L4_L7	Cluster 221	3.47916	P9WQN9	fbpC	Rv0129c	Diacylglycerolacyltransferase/mycolyltransferaseAg85C	11
intermediary metabolism and respiration	L4_L7	Cluster 221	3.49298	P9WK95	leuD	Rv2987c	3-isopropylmalatedehydratasesmallsubunit	13
	L4_L7	Cluster 221	3.5062	P9WN41	glmM		Phosphoglucosaminemutase	18
	L4_L7	Cluster 221	3.59567	P9WNM5	cysNC		BifunctionalenzymeCysN/CysC	23
intermediary metabolism and respiration	L4_L7	Cluster 221	3.65358	P9WNE9	Rv3230c	Rv3230c	NADPHoxidoreductase	13
	L4_L7	Cluster 221	3.7258	P9WP43	Rv1984c		ProbablecutinaseRv1984c	4
cell wall and cell processes	L4_L7	Cluster 221	3.78759	P9WIN9	mpt64	Rv1980c	ImmunogenicproteinMPT64	11
cell wall and cell processes	L4_L7	Cluster 221	3.79245	P9WJK9	murG	Rv2153c	UDP-N-acetylglucosamine--N-acetylmuramyl-(pentapeptide)pyrophosphoryl-undecaprenolN-acetylglucosaminetransferase	20
information pathways	L4_L7	Cluster 221	3.83799	O06563	typA	Rv1165	PossibleGTP-bindingtranslationelongationfactorTypA(TyrosinephosphorylatedproteinA)(GTP-bindingprotein)	29
intermediary metabolism and respiration	L4_L7	Cluster 221	3.89467	P9WMV7	Rv0492c	Rv0492c	UncharacterizedGMC-typeoxidoreductaseRv0492c	18
intermediary metabolism and respiration	L4_L7	Cluster 221	3.93755	P9WQF5	leuC	Rv2988c	3-isopropylmalatedehydrataselargesubunit	19
intermediary metabolism and respiration	L4_L7	Cluster 221	4.00197	P9WKI1	ino1	Rv0046c	Inositol-3-phosphatesynthase	20
cell wall and cell processes	L4_L7	Cluster 221	4.02467	I6Y8R4	Rv0774c	Rv0774c	Probableconservedexportedprotein	3
lipid metabolism	L4_L7	Cluster 221	4.0489	P9WPF5	pks10	Rv1660	Polyketidesynthase-likePks10	8
cell wall and cell processes	L4_L7	Cluster 221	4.06527	O53572	Rv3587c	Rv3587c	Probableconservedmembraneprotein	11
intermediary metabolism and respiration	L4_L7	Cluster 221	4.09229	P9WJM7	mshD	Rv0819	Mycothiolacetyltransferase	16
conserved hypotheticals	L4_L7	Cluster 221	4.15414	O86351	Rv1111c	Rv1111c	Uncharacterizedprotein	7
conserved hypotheticals	L4_L7	Cluster 221	4.30025	I6X579	Rv2728c	Rv2728c	Conservedalaninerichprotein	11
conserved hypotheticals	L4_L7	Cluster 221	4.3244	P9WIY9	Rv1063c	Rv1063c	UncharacterizedNTEfamilyproteinRv1063c	13
	L4_L7	Cluster 221	4.35937	O06401	mtnP		S-methyl-5'-thioadenosinephosphorylase	12
intermediary metabolism and respiration	L4_L7	Cluster 221	4.44139	Q50584	Rv1523	Rv1523	Probablemethyltransferase	15
conserved hypotheticals	L4_L7	Cluster 221	4.44148	O53518	Rv2184c	Rv2184c	Uncharacterizedprotein	8
information pathways	L4_L7	Cluster 221	4.48184	P9WFC5	uvrC	Rv1420	UvrABCsystemproteinC	17
lipid metabolism	L4_L7	Cluster 221	4.51254	O06542	echA10	Rv1142c	Probableenoyl-CoAhydrataseEchA10(Enoylhydrase)(Unsaturatedacyl-CoAhydratase)(Crotonase)	10
cell wall and cell processes	L4_L7	Cluster 221	4.53987	O53380	dacB1	Rv3330	Probablepenicillin-bindingproteinDacB1(D-alanyl-D-alaninecarboxypeptidase)(DD-peptidase)(DD-carboxypeptidase)(PBP)(DD-transpeptidase)(Serine-typeD-ala-D-alacarboxypeptidase)(D-aminoacid...	11
cell wall and cell processes	L4_L7	Cluster 221	4.55146	I6YDV4	Rv2609c	Rv2609c	Probableconservedmembraneprotein	9
lipid metabolism	L4_L7	Cluster 221	4.57579	P9WQ63	mbtB	Rv2383c	PhenyloxazolinesynthaseMbtB	38
intermediary metabolism and respiration	L4_L7	Cluster 221	4.68195	P9WQG7	Rv0802c	Rv0802c	Putativesuccinyl-CoAtransferaseRv0802c	10
conserved hypotheticals	L4_L7	Cluster 221	4.69332	O53751	Rv0466	Rv0466	Conservedprotein	15
cell wall and cell processes	L4_L7	Cluster 221	4.70485	P9WJ95	iniC	Rv0343	Isoniazid-inducedproteinIniC	32
PE/PPE families	L4_L7	Cluster 221	4.70577	P9WHZ7	PPE40	Rv2356c	UncharacterizedPPEfamilyproteinPPE40	2
conserved hypotheticals	L4_L7	Cluster 221	4.80461	P9WLA9	Rv2411c	Rv2411c	UncharacterizedproteinRv2411c	25
information pathways	L4_L7	Cluster 221	4.82504	P9WH07	ksgA	Rv1010	RibosomalRNAsmallsubunitmethyltransferaseA	14
intermediary metabolism and respiration	L4_L7	Cluster 221	4.85459	P9WIB9	Rv1885c	Rv1885c	Secretedchorismatemutase	10
intermediary metabolism and respiration	L4_L7	Cluster 221	4.855	P9WIK1	cysD	Rv1285	Sulfateadenylyltransferasesubunit2	14
intermediary metabolism and respiration	L4_L7	Cluster 221	4.8556	P95234	moeW	Rv2338c	PossiblemolybdopterinbiosynthesisproteinMoeW	18
	L4_L7	Cluster 221	5.05461	L7N675	P18		PPEfamilyproteinPPE18	9
lipid metabolism	L4_L7	Cluster 221	5.07561	O06541	echA11	Rv1141c	Probableenoyl-CoAhydrataseEchA11(Enoylhydrase)(Unsaturatedacyl-CoAhydratase)(Crotonase)	10
conserved hypotheticals	L4_L7	Cluster 221	5.08275	P71813	Rv0756c	Rv0756c	Uncharacterizedprotein	11
information pathways	L4_L7	Cluster 221	5.08596	P9WHJ3	recA	Rv2737c	ProteinRecA	18
lipid metabolism	L4_L7	Cluster 221	5.16007	O53901	pks5	Rv1527c	Mycocerosicacidsynthase-likepolyketidesynthase	91
lipid metabolism	L4_L7	Cluster 221	5.19463	P9WQ49	fadD21	Rv1185c	Putativefatty-acid--CoAligaseFadD21	17
	L4_L7	Cluster 221	5.29525	P9WK35	ribE		Riboflavinsynthase	11
lipid metabolism	L4_L7	Cluster 221	5.33135	O69687	Rv3720	Rv3720	ProbablefattyacidmethyltransferaseRv3720	21
cell wall and cell processes	L4_L7	Cluster 221	5.43835	P9WN95	ftsZ	Rv2150c	CelldivisionproteinFtsZ	16
intermediary metabolism and respiration	L4_L7	Cluster 221	5.49908	P9WJJ7	nadC	Rv1596	Nicotinate-nucleotidepyrophosphorylase[carboxylating]	14
information pathways	L4_L7	Cluster 221	5.79195	I6YCF3	helZ	Rv2101	ProbablehelicaseHelZ	33
conserved hypotheticals	L4_L7	Cluster 221	5.80598	I6XEI5	Rv2525c	Rv2525c	PutativepeptidoglycanhydrolaseRv2525c	14
cell wall and cell processes	L4_L7	Cluster 221	5.92559	O33363	Rv0518	Rv0518	Possibleexportedprotein	7
	L4_L7	Cluster 221	6.0786	P9WHU5	ripB		PeptidoglycanendopeptidaseRipB	9
Regulatory proteins	L4_L7	Cluster 221	6.19588	P9WI75	pknF	Rv1746	Serine/threonine-proteinkinasePknF	15
cell wall and cell processes	L4_L7	Cluster 221	6.3729	P9WPR9	Rv1488	Rv1488	UncharacterizedproteinRv1488	22
cell wall and cell processes	L4_L7	Cluster 221	6.4199	P9WGU1	pstS1	Rv0934	Phosphate-bindingproteinPstS1	12
conserved hypotheticals	L4_L7	Cluster 221	6.62449	P9WL15	Rv2927c	Rv2927c	UncharacterizedproteinRv2927c	17
cell wall and cell processes	L4_L7	Cluster 221	6.83916	P9WJT5	mmpS1	Rv0403c	ProbabletransportaccessoryproteinMmpS1	2
lipid metabolism	L4_L7	Cluster 221	7.40069	P9WKB5	Rv2285	Rv2285	PutativediacyglycerolO-acyltransferaseRv2285	20
cell wall and cell processes	L4_L7	Cluster 221	7.41538	P9WJV1	mmpL5	Rv0676c	SiderophoreexporterMmpL5	17
	L4_L7	Cluster 221	7.86349	I6YD99	Rv2386A		UncharacterizedproteinRv2386A/RVBD	4
conserved hypotheticals	L4_L7	Cluster 221	8.00244	O33198	Rv1697	Rv1697	Uncharacterizedprotein	17
PE/PPE families	L4_L7	Cluster 221	8.01476	P9WI23	PPE20	Rv1387	UncharacterizedPPEfamilyproteinPPE20	6
conserved hypotheticals	L4_L7	Cluster 221	8.22999	P96389	Rv0207c	Rv0207c	Uncharacterizedprotein	12
cell wall and cell processes	L4_L7	Cluster 221	8.28959	O07423	lprO	Rv0179c	PossiblelipoproteinLprO	10
cell wall and cell processes	L4_L7	Cluster 221	8.47598	P9WNR3	eccB3	Rv0283	ESX-3secretionsystemATPaseEccB3	28
lipid metabolism	L4_L7	Cluster 221	8.58216	I6X4S7	tesB2	Rv2605c	Probableacyl-CoAthioesteraseIITesB2(TEII)	12
intermediary metabolism and respiration	L4_L7	Cluster 221	8.70479	P9WNH3	Rv2715	Rv2715	UncharacterizedproteinRv2715	21
lipid metabolism	L4_L7	Cluster 221	8.9538	P9WFI3	Rv0830	Rv0830	PutativeS-adenosyl-L-methionine-dependentmethyltransferaseRv0830	17
cell wall and cell processes	L4_L7	Cluster 221	9.48791	P9WGT9	pstS2	Rv0932c	Phosphate-bindingproteinPstS2	13
intermediary metabolism and respiration	L4_L7	Cluster 221	10.9382	P96816	Rv0139	Rv0139	Possibleoxidoreductase	20
conserved hypotheticals	L4_L7	Cluster 221	11.5292	P71922	Rv2426c	Rv2426c	Uncharacterizedprotein	17
cell wall and cell processes	L4_L7	Cluster 221	11.643	P9WNQ3	eccD3	Rv0290	ESX-3secretionsystemproteinEccD3	9
information pathways	L4_L7	Cluster 221	11.7841	P9WGW3	ruvA	Rv2593c	HollidayjunctionATP-dependentDNAhelicaseRuvA	11
cell wall and cell processes	L4_L7	Cluster 221	13.1739	P9WNA9	eccC3	Rv0284	ESX-3secretionsystemproteinEccC3	76
cell wall and cell processes	L4_L7	Cluster 221	13.6614	P9WPI3	eccA3	Rv0282	ESX-3secretionsystemproteinEccA3	39
cell wall and cell processes	L4_L7	Cluster 221	14.0313	P9WJE5	eccE3	Rv0292	ESX-3secretionsystemproteinEccE3	18
Regulatory proteins	L4_L7	Cluster 221	15.4918	P9WI77	pknE	Rv1743	Serine/threonine-proteinkinasePknE	17
intermediary metabolism and respiration	L4_L7	Cluster 221	15.633	O53695	mycP3	Rv0291	Mycosin-3	12
conserved hypotheticals	L4_L7	Cluster 221	17.5789	P9WM91	Rv0036c	Rv0036c	UncharacterizedproteinRv0036c	19
conserved hypotheticals	L4_L7	Cluster 221	18.5064	P9WIH5	Rv2047c	Rv2047c	UncharacterizedproteinRv2047c	28
intermediary metabolism and respiration	L4_L7	Cluster 221	18.5134	P9WIN3	Rv2952	Rv2952	Phthiotriol/phenolphthiotrioldimycocerosatesmethyltransferase	20
intermediary metabolism and respiration	L4_L7	Cluster 221	23.286	O65931	atsB	Rv3299c	ProbablearylsulfataseAtsB(Aryl-sulfatesulphohydrolase)(Sulfatase)	31
lipid metabolism	L4_L7	Cluster 221	26.7632	P0CH91	mmaA3	Rv0643c	MethoxymycolicacidsynthaseMmaA3	20
cell wall and cell processes	L4_L7	Cluster 221	27.6336	P9WJC1	espK	Rv3879c	ESX-1secretion-associatedproteinEspK	25
lipid metabolism	L4_L7	Cluster 221	31.1848	P9WMV9	choD	Rv3409c	Cholesteroloxidase	23
intermediary metabolism and respiration	L4_L7	Cluster 221	42.8763	P9WPD3	citA	Rv0889c	Putativecitratesynthase2	17
virulence, detoxification and adaptation	L4_L7	Cluster 221	49.6792	P9WG35	tpx	Rv1932	Probablethiolperoxidase	9
cell wall and cell processes	L4_L7	Cluster 221	62.2603	P9WK47	lprF	Rv1368	PutativediacylatedglycolipidtransporterLprF	12
lipid metabolism	L4_L7	Cluster 221	72.2667	O53521	fadD15	Rv2187	Long-chain-fatty-acid--CoAligaseFadD15	37
conserved hypotheticals	L4_L7	Cluster 221	103.512	O86340	Rv2061c	Rv2061c	Conservedprotein	12
intermediary metabolism and respiration	L4_L7	Cluster 220	2.9161	I6YGW6	Rv3673c	Rv3673c	Possiblemembrane-anchoredthioredoxin-likeprotein(Thiol-disulfideinterchangerelatedprotein)	6
virulence, detoxification and adaptation	L4_L7	Cluster 220	3.19361	O07412	yrbE1A	Rv0167	ConservedintegralmembraneproteinYrbE1A	6	Cluster 220 (N= 45)
cell wall and cell processes	L4_L7	Cluster 220	3.31496	P9WJL5	murD	Rv2155c	UDP-N-acetylmuramoylalanine--D-glutamateligase	15
	L4_L7	Cluster 220	3.43207	P9WP59	mftE		PutativemycofactocinsystemcreatinineamidohydrolasefamilyproteinMftE	8
lipid metabolism	L4_L7	Cluster 220	3.45638	O53580	fadD32	Rv3801c	Long-chain-fatty-acid--AMPligaseFadD32	36
intermediary metabolism and respiration	L4_L7	Cluster 220	3.51786	P9WIC5	Rv2949c	Rv2949c	Chorismatepyruvate-lyase	10
virulence, detoxification and adaptation	L4_L7	Cluster 220	3.71299	O53168	ripA	Rv1477	PeptidoglycanendopeptidaseRipA	10
lipid metabolism	L4_L7	Cluster 220	3.82972	O07411	fadD5	Rv0166	Probablefatty-acid-CoAligaseFadD5(Fatty-acid-CoAsynthetase)(Fatty-acid-CoAsynthase)	23
virulence, detoxification and adaptation	L4_L7	Cluster 220	3.89208	L0T2W6	mce1F	Rv0174	Mce-familyproteinMce1F	23
cell wall and cell processes	L4_L7	Cluster 220	4.05989	O50416	lpqD	Rv3390	ProbableconservedlipoproteinLpqD	10
lipid metabolism	L4_L7	Cluster 220	4.08444	I6Y4Z4	fadD16	Rv0852	Possiblefatty-acid-CoAligaseFadD16(Fatty-acid-CoAsynthetase)(Fatty-acid-CoAsynthase)	7
virulence, detoxification and adaptation	L4_L7	Cluster 220	4.2049	O07414	mce1B	Rv0170	Mce-familyproteinMce1B	25
virulence, detoxification and adaptation	L4_L7	Cluster 220	4.24993	Q79FZ9	mce1A	Rv0169	Mce-familyproteinMce1A	21
intermediary metabolism and respiration	L4_L7	Cluster 220	4.29286	P9WIM5	Rv2959c	Rv2959c	RhamnosylO-methyltransferase	9
conserved hypotheticals	L4_L7	Cluster 220	4.38872	P71923	Rv2425c	Rv2425c	Uncharacterizedprotein	5
cell wall and cell processes	L4_L7	Cluster 220	4.49222	P9WJL1	murF	Rv2157c	UDP-N-acetylmuramoyl-tripeptide--D-alanyl-D-alanineligase	24
cell wall and cell processes	L4_L7	Cluster 220	4.49749	O07417	lprK	Rv0173	PossibleMce-familylipoproteinLprK(Mce-familylipoproteinMce1E)	24
conserved hypotheticals	L4_L7	Cluster 220	4.65987	P95147	Rv1868	Rv1868	Uncharacterizedprotein	18
cell wall and cell processes	L4_L7	Cluster 220	4.77606	P9WNJ7	esxK	Rv1197	ESAT-6-likeproteinEsxK	7
	L4_L7	Cluster 220	4.80941	A0A089QRB9	msl3		Mycolipanoatesynthase	91
intermediary metabolism and respiration	L4_L7	Cluster 220	5.36244	P9WKE9	gmk	Rv1389	Guanylatekinase	15
Regulatory proteins	L4_L7	Cluster 220	5.55987	P71888	Rv2324	Rv2324	Probabletranscriptionalregulatoryprotein(ProbablyAsnC-family)	12
	L4_L7	Cluster 220	5.59656	P9WHR5	caeB		CarboxylesteraseB	13
cell wall and cell processes	L4_L7	Cluster 220	5.68295	P9WJV7	mmpL2	Rv0507	ProbabletransportproteinMmpL2	14
virulence, detoxification and adaptation	L4_L7	Cluster 220	5.80208	O06624	Rv1566c	Rv1566c	PossibleInvprotein	7
cell wall and cell processes	L4_L7	Cluster 220	5.81968	P9WNI7	esxO	Rv2346c	ESAT-6-likeproteinEsxO	5
lipid metabolism	L4_L7	Cluster 220	5.90129	I6Y7V6	fadD31	Rv1925	Probableacyl-CoAligaseFadD31(Acyl-CoAsynthetase)(Acyl-CoAsynthase)	34
virulence, detoxification and adaptation	L4_L7	Cluster 220	6.07044	L0T2Q9	yrbE1B	Rv0168	ConservedintegralmembraneproteinYrbE1B	5
intermediary metabolism and respiration	L4_L7	Cluster 220	6.51782	P9WIB1	plcC	Rv2349c	PhospholipaseC3	10
	L4_L7	Cluster 220	6.65312	P9WMX1	mftF		PutativemycofactocinbiosynthesisglycosyltransferaseMftF	14
	L4_L7	Cluster 220	7.11069	P9WIN7	mtb12		LowmolecularweightantigenMTB12	4
cell wall and cell processes	L4_L7	Cluster 220	8.13324	O07236	Rv0309	Rv0309	Possibleconservedexportedprotein	7
intermediary metabolism and respiration	L4_L7	Cluster 220	8.31445	O06561	narJ	Rv1163	Probablerespiratorynitratereductase(Deltachain)NarJ	9
virulence, detoxification and adaptation	L4_L7	Cluster 220	8.71143	P9WLZ1	vapB10	Rv1398c	PutativeantitoxinVapB10	7
cell wall and cell processes	L4_L7	Cluster 220	9.14675	O53692	esxG	Rv0287	ESAT-6-likeproteinEsxG	3
cell wall and cell processes	L4_L7	Cluster 220	9.3451	P9WNK5	esxB	Rv3874	ESAT-6-likeproteinEsxB	9
cell wall and cell processes	L4_L7	Cluster 220	9.36157	O53527	Rv2253	Rv2253	Uncharacterizedprotein	8
intermediary metabolism and respiration	L4_L7	Cluster 220	9.64526	O50406	Rv3377c	Rv3377c	TypeBditerpenecyclase	7
virulence, detoxification and adaptation	L4_L7	Cluster 220	10.4808	P9WFA7	vapC10	Rv1397c	RibonucleaseVapC10	6
intermediary metabolism and respiration	L4_L7	Cluster 220	11.4454	O86346	Rv0939	Rv0939	Possiblebifunctionalenzyme:2-hydroxyhepta-2,4-diene-1,7-dioateisomerase(HHDDisomerase)+cyclase/dehydrase	16
lipid metabolism	L4_L7	Cluster 220	54.8953	O50431	fadH	Rv1175c	ProbableNADPHdependent2,4-dienoyl-CoAreductaseFadH(2,4-dienoylcoenzymeAreductase)(4-enoyl-CoAreductase)	40
conserved hypotheticals	L4_L7	Cluster 220	61.2751	O06218	Rv2159c	Rv2159c	AlkylhydroperoxidereductaseAhpD	26
intermediary metabolism and respiration	L4_L7	Cluster 220	67.7097	P9WN25	glbN	Rv1542c	Group1truncatedhemoglobinGlbN	7
intermediary metabolism and respiration	L4_L7	Cluster 220	93.257	P9WJQ3	narG	Rv1161	Nitratereductasealphasubunit	64
intermediary metabolism and respiration	L4_L7	Cluster 220	2515.27	O06216	Rv2161c	Rv2161c	Conservedprotein	26
intermediary metabolism and respiration	L4_L7	Cluster -112	-4.37805	P9WNK9	era	Rv2364c	GTPaseEra	16
