# Supplementary material for: Lineage-Specific Proteomic Signatures in the Mycobacterium tuberculosis Complex Reveal Differential Abundance of Proteins Involved in Virulence, DNA Repair, CRISPR-Cas, Bioenergetics and Lipid Metabolism
Source: Front Microbiol. 2020 Sep 22;11:550760. doi: 10.3389/fmicb.2020.550760 (PMC7536270; doi:10.3389/fmicb.2020.550760)
Supplement: FILE S9 — Protein abundance comparison using Welch’s t-test between the MTBC lineages: Protein abundance comparison between lineages 4 and 5. [file Data_Sheet_9.xlsx]

## Sheet: Sheet2
Functional category	Welch's T-test significant	Cluster	Fold changes	Protein Ids	Gene Ids	RV number	Protein name	Peptides
intermediary metabolism and respiration	L4_L5	Cluster 85	-10.2475	P9WN25	glbN	Rv1542c	Group1truncatedhemoglobinGlbN	7
conserved hypotheticals	L4_L5	Cluster 85	-6.7226	I6X9X6	Rv0839	Rv0839	Uncharacterizedprotein	13		Summary of Welch's t test significant proteins ( L4 vs L5) by functional category according to the Tuberculist database.
										Note: A total of 119 proteins out of the 129 significant were assigned to one of the protein functional category.
	L4_L5	Cluster 124	3.35141	P9WP59	mftE		PutativemycofactocinsystemcreatinineamidohydrolasefamilyproteinMftE	8
virulence, detoxification and adaptation	L4_L5	Cluster 124	3.41522	Q79FZ9	mce1A	Rv0169	Mce-familyproteinMce1A	21
virulence, detoxification and adaptation	L4_L5	Cluster 124	3.54383	O07412	yrbE1A	Rv0167	ConservedintegralmembraneproteinYrbE1A	6
lipid metabolism	L4_L5	Cluster 124	3.59701	O50417	acrA1	Rv3391	Possiblemulti-functionalenzymewithacyl-CoA-reductaseactivityAcrA1	16
cell wall and cell processes	L4_L5	Cluster 124	3.65459	O07417	lprK	Rv0173	PossibleMce-familylipoproteinLprK(Mce-familylipoproteinMce1E)	24
PE/PPE families	L4_L5	Cluster 124	3.69366	P9WHZ9	PPE38	Rv2352c	UncharacterizedPPEfamilyproteinPPE38	3
intermediary metabolism and respiration	L4_L5	Cluster 124	3.80203	P95290	lipD	Rv1923	ProbablelipaseLipD	17
cell wall and cell processes	L4_L5	Cluster 124	3.87998	P9WNK5	esxB	Rv3874	ESAT-6-likeproteinEsxB	9
cell wall and cell processes	L4_L5	Cluster 124	4.01753	P9WJL1	murF	Rv2157c	UDP-N-acetylmuramoyl-tripeptide--D-alanyl-D-alanineligase	24
virulence, detoxification and adaptation	L4_L5	Cluster 124	4.15005	L0T2Q9	yrbE1B	Rv0168	ConservedintegralmembraneproteinYrbE1B	5
cell wall and cell processes	L4_L5	Cluster 124	4.20163	O05450	eccC2	Rv3894c	ESXconservedcomponentEccC2.ESX-2typeVIIsecretionsystemprotein.Possiblemembraneprotein	44
intermediary metabolism and respiration	L4_L5	Cluster 124	4.37429	P9WN89	frdB	Rv1553	Fumaratereductaseiron-sulfursubunit	16
intermediary metabolism and respiration	L4_L5	Cluster 124	4.38881	O07230	Rv0303	Rv0303	Probabledehydrogenase/reductase	17
cell wall and cell processes	L4_L5	Cluster 124	4.4093	P9WJE7	eccE2	Rv3885c	ESX-2secretionsystemproteinEccE2	18
intermediary metabolism and respiration	L4_L5	Cluster 124	4.47737	P9WQ31	Rv1319c	Rv1319c	UncharacterizedproteinRv1319c	13
lipid metabolism	L4_L5	Cluster 124	4.50479	O07169	fadD7	Rv0119	Probablefatty-acid-CoAligaseFadD7(Fatty-acid-CoAsynthetase)(Fatty-acid-CoAsynthase)	19
cell wall and cell processes	L4_L5	Cluster 124	4.56489	O07236	Rv0309	Rv0309	Possibleconservedexportedprotein	7
intermediary metabolism and respiration	L4_L5	Cluster 124	4.6126	P9WKE9	gmk	Rv1389	Guanylatekinase	15
	L4_L5	Cluster 124	4.64108	P9WNM9	Rv0120c		ElongationfactorG-likeprotein	41	Cluster 124 (N=66)
intermediary metabolism and respiration	L4_L5	Cluster 124	4.8383	O53370	sdhA	Rv3318	Succinatedehydrogenaseflavoproteinsubunit	23
intermediary metabolism and respiration	L4_L5	Cluster 124	5.0812	P9WNW7	hsaC	Rv3568c	Iron-dependentextradioldioxygenase	24
	L4_L5	Cluster 124	5.65004	P9WHP5	Rv2744c		35kDaprotein	25
	L4_L5	Cluster 124	5.69431	P9WMX1	mftF		PutativemycofactocinbiosynthesisglycosyltransferaseMftF	14
lipid metabolism	L4_L5	Cluster 124	5.77612	O07411	fadD5	Rv0166	Probablefatty-acid-CoAligaseFadD5(Fatty-acid-CoAsynthetase)(Fatty-acid-CoAsynthase)	23
cell wall and cell processes	L4_L5	Cluster 124	5.91747	O53962	Rv1920	Rv1920	Probablemembraneprotein	12
cell wall and cell processes	L4_L5	Cluster 124	6.71846	O53692	esxG	Rv0287	ESAT-6-likeproteinEsxG	3
PE/PPE families	L4_L5	Cluster 124	6.79319	P9WI05	PPE32	Rv1808	UncharacterizedPPEfamilyproteinPPE32	5
conserved hypotheticals	L4_L5	Cluster 124	6.8993	P95215	Rv0258c	Rv0258c	Uncharacterizedprotein	5
cell wall and cell processes	L4_L5	Cluster 124	6.98926	P9WNK7	esxA	Rv3875	6kDaearlysecretoryantigenictarget	6
conserved hypotheticals	L4_L5	Cluster 124	7.25075	P9WLA3	Rv2558	Rv2558	UncharacterizedproteinRv2558	11
intermediary metabolism and respiration	L4_L5	Cluster 124	7.78782	O86346	Rv0939	Rv0939	Possiblebifunctionalenzyme:2-hydroxyhepta-2,4-diene-1,7-dioateisomerase(HHDDisomerase)+cyclase/dehydrase	16
conserved hypotheticals	L4_L5	Cluster 124	7.83792	P95147	Rv1868	Rv1868	Uncharacterizedprotein	18
virulence, detoxification and adaptation	L4_L5	Cluster 124	8.09101	P9WK09	mymT	Rv0186A	Metallothionein	4
lipid metabolism	L4_L5	Cluster 124	8.49009	P9WQH9	accD3	Rv0904c	Putativeacetyl-coenzymeAcarboxylasecarboxyltransferasesubunitbeta	15
cell wall and cell processes	L4_L5	Cluster 124	8.49969	P9WJV7	mmpL2	Rv0507	ProbabletransportproteinMmpL2	14
conserved hypotheticals	L4_L5	Cluster 124	8.63568	I6XY36	Rv1498A	Rv1498A	Conservedprotein	4
intermediary metabolism and respiration	L4_L5	Cluster 124	9.01208	O50406	Rv3377c	Rv3377c	TypeBditerpenecyclase	7
	L4_L5	Cluster 124	9.17457	P9WI93	Rv1159.1		Putativepterin-4-alpha-carbinolaminedehydratase	9
intermediary metabolism and respiration	L4_L5	Cluster 124	10.8966	Q6MWY3	moaX	Rv3323c	Molybdopterinsynthasesulfurcarriersubunit	12
intermediary metabolism and respiration	L4_L5	Cluster 124	11.5318	O06561	narJ	Rv1163	Probablerespiratorynitratereductase(Deltachain)NarJ	9
virulence, detoxification and adaptation	L4_L5	Cluster 124	11.9023	P9WFA7	vapC10	Rv1397c	RibonucleaseVapC10	6
conserved hypotheticals	L4_L5	Cluster 124	12.0532	P9WL59	Rv2633c	Rv2633c	UncharacterizedproteinRv2633c	11
	L4_L5	Cluster 124	12.4571	P71635	csm6		CRISPR-associatedproteinCsm6	24
virulence, detoxification and adaptation	L4_L5	Cluster 124	13.4003	P9WLZ1	vapB10	Rv1398c	PutativeantitoxinVapB10	7
conserved hypotheticals	L4_L5	Cluster 124	14.5002	O53404	Rv1056	Rv1056	Conservedprotein	15
lipid metabolism	L4_L5	Cluster 124	16.9629	P9WPW5	scoA	Rv2504c	Probablesuccinyl-CoA:3-ketoacidcoenzymeAtransferasesubunitA	11
conserved hypotheticals	L4_L5	Cluster 124	18.1028	O53978	Rv1977	Rv1977	Conservedprotein	19
lipid metabolism	L4_L5	Cluster 124	18.6303	P9WPW3	scoB	Rv2503c	Probablesuccinyl-CoA:3-ketoacidcoenzymeAtransferasesubunitB	9
lipid metabolism	L4_L5	Cluster 124	19.2522	O53422	fadA3	Rv1074c	Probablebeta-ketoacylCoAthiolaseFadA3	24
cell wall and cell processes	L4_L5	Cluster 124	19.2746	O53527	Rv2253	Rv2253	Uncharacterizedprotein	8
lipid metabolism	L4_L5	Cluster 124	19.9614	P9WHN9	php	Rv0230c	Phosphotriesterasehomologyprotein	11
cell wall and cell processes	L4_L5	Cluster 124	20.8948	I6X7X3	lpqG	Rv3623	ProbableconservedlipoproteinLpqG	9
lipid metabolism	L4_L5	Cluster 124	25.6266	P96404	echA1	Rv0222	Probableenoyl-CoAhydrataseEchA1(Enoylhydrase)(Unsaturatedacyl-CoAhydratase)(Crotonase)	13
intermediary metabolism and respiration	L4_L5	Cluster 124	30.2529	P95059	atsA	Rv0711	PossiblearylsulfataseAtsA(Aryl-sulfatesulphohydrolase)(Arylsulphatase)	20
intermediary metabolism and respiration	L4_L5	Cluster 124	32.1757	P71662	Rv1393c	Rv1393c	Probablemonoxygenase	20
lipid metabolism	L4_L5	Cluster 124	32.8844	P9WQ45	fadD25	Rv1521	Putativefatty-acid--CoAligasefadD25	27
conserved hypotheticals	L4_L5	Cluster 124	34.7245	O06218	Rv2159c	Rv2159c	AlkylhydroperoxidereductaseAhpD	26
conserved hypotheticals	L4_L5	Cluster 124	37.6049	O50398	Rv3369	Rv3369	Conservedprotein	5
intermediary metabolism and respiration	L4_L5	Cluster 124	40.8221	P72041	lipE	Rv3775	ProbablelipaseLipE	25
lipid metabolism	L4_L5	Cluster 124	58.921	O50431	fadH	Rv1175c	ProbableNADPHdependent2,4-dienoyl-CoAreductaseFadH(2,4-dienoylcoenzymeAreductase)(4-enoyl-CoAreductase)	40
	L4_L5	Cluster 124	73.7331	A0A089QRB9	msl3		Mycolipanoatesynthase	91
virulence, detoxification and adaptation	L4_L5	Cluster 124	85.3358	P9WMJ7	htpG	Rv2299c	ChaperoneproteinHtpG	41
cell wall and cell processes	L4_L5	Cluster 124	116.255	P9WNI7	esxO	Rv2346c	ESAT-6-likeproteinEsxO	5
intermediary metabolism and respiration	L4_L5	Cluster 124	125.979	O53371	sdhB	Rv3319	Probablesuccinatedehydrogenase(Iron-sulphurproteinsubunit)SdhB(Succinicdehydrogenase)(Fumaratereductase)(Fumaratedehydrogenase)(Fumarichydrogenase)	13
intermediary metabolism and respiration	L4_L5	Cluster 124	141.431	P9WJQ3	narG	Rv1161	Nitratereductasealphasubunit	64
intermediary metabolism and respiration	L4_L5	Cluster 124	1724.07	O06216	Rv2161c	Rv2161c	Conservedprotein	26
lipid metabolism	L4_L5	Cluster 123	-828.145	P96285	pks1	Rv2946c	PutativeinactivephenolphthiocerolsynthesispolyketidesynthasetypeIPks1	47	Cluster 123 (N=39)
intermediary metabolism and respiration	L4_L5	Cluster 123	-336.297	P9WNK9	era	Rv2364c	GTPaseEra	16
conserved hypotheticals	L4_L5	Cluster 123	-43.2569	P71784	Rv1505c	Rv1505c	Uncharacterizedprotein	10
	L4_L5	Cluster 123	-40.7619	P9WKK7	icl		Isocitratelyase	21
conserved hypotheticals	L4_L5	Cluster 123	-38.7725	P9WML1	Rv1262c	Rv1262c	UncharacterizedHIT-likeproteinRv1262c	8
lipid metabolism	L4_L5	Cluster 123	-34.6494	P9WQ43	fadD26	Rv2930	Long-chain-fatty-acid--AMPligaseFadD26	33
lipid metabolism	L4_L5	Cluster 123	-27.9617	P9WI59	plsB1	Rv1551	PutativeacyltransferaseplsB1	27
conserved hypotheticals	L4_L5	Cluster 123	-19.5806	O53363	Rv3312c	Rv3312c	Uncharacterizedprotein	11
intermediary metabolism and respiration	L4_L5	Cluster 123	-17.5213	P9WH09	rmlD	Rv3266c	dTDP-4-dehydrorhamnosereductase	13
intermediary metabolism and respiration	L4_L5	Cluster 123	-15.3882	I6Y340	Rv0216	Rv0216	Doublehotdoghydratase	20
conserved hypotheticals	L4_L5	Cluster 123	-12.6332	P9WJA3	hrp1	Rv2626c	Hypoxicresponseprotein1	7
conserved hypotheticals	L4_L5	Cluster 123	-12.3748	P71794	Rv1515c	Rv1515c	Uncharacterizedprotein	13
conserved hypotheticals	L4_L5	Cluster 123	-11.7243	P9WLN9	Rv1998c	Rv1998c	UncharacterizedproteinRv1998c	10
lipid metabolism	L4_L5	Cluster 123	-11.2728	P94996	pks7	Rv1661	ProbablepolyketidesynthasePks7	60
cell wall and cell processes	L4_L5	Cluster 123	-9.66875	P9WJC9	espG2	Rv3889c	ESX-2secretion-associatedproteinEspG2	8
lipid metabolism	L4_L5	Cluster 123	-9.61849	P9WNN7	echA12	Rv1472	Probableenoyl-CoAhydrataseechA12	14
lipid metabolism	L4_L5	Cluster 123	-9.28531	P9WQ53	fadD11	Rv1550	Putativefatty-acid--CoAligasefadD11	21
lipid metabolism	L4_L5	Cluster 123	-8.91355	O07721	fadB5	Rv1912c	PossibleoxidoreductaseFadB5	17
conserved hypotheticals	L4_L5	Cluster 123	-8.32321	P9WIL1	Rv2573	Rv2573	Putative2-dehydropantoate2-reductase	13
intermediary metabolism and respiration	L4_L5	Cluster 123	-7.43849	O06138	cydD	Rv1621c	Probable'componentlinkedwiththeassemblyofcytochrome'transporttransmembraneATP-bindingproteinABCtransporterCydD	19
intermediary metabolism and respiration	L4_L5	Cluster 123	-7.28672	P95160	ndh	Rv1854c	ProbableNADHdehydrogenaseNdh	12
lipid metabolism	L4_L5	Cluster 123	-6.81409	P9WQE7	ppsA	Rv2931	PhthiocerolsynthesispolyketidesynthasetypeIPpsA	61
virulence, detoxification and adaptation	L4_L5	Cluster 123	-6.11825	P9WMK1	hspX	Rv2031c	Alpha-crystallin	10
	L4_L5	Cluster 123	-5.97927	I6WZK7	mmcO		MulticopperoxidaseMmcO	10
cell wall and cell processes	L4_L5	Cluster 123	-5.95392	O53582	aftB	Rv3805c	Terminalbeta-(1->2)-arabinofuranosyltransferase	13
cell wall and cell processes	L4_L5	Cluster 123	-5.79553	P9WQL9	drrA	Rv2936	DoxorubicinresistanceATP-bindingproteinDrrA	19
lipid metabolism	L4_L5	Cluster 123	-5.52843	P71857	fadE28	Rv3544c	Acyl-CoAdehydrogenaseFadE28	12
lipid metabolism	L4_L5	Cluster 123	-5.3247	O86318	accD2	Rv0974c	Probableacetyl-/propionyl-CoAcarboxylase(Betasubunit)AccD2	14
intermediary metabolism and respiration	L4_L5	Cluster 123	-4.87651	P9WPP1	cyp125	Rv3545c	SteroidC26-monooxygenase	19
virulence, detoxification and adaptation	L4_L5	Cluster 123	-4.50716	P9WHS5	htpX	Rv0563	ProteaseHtpXhomolog	8
conserved hypotheticals	L4_L5	Cluster 123	-4.32728	P9WLS3	Rv1738	Rv1738	UncharacterizedproteinRv1738	4
Regulatory proteins	L4_L5	Cluster 123	-4.24084	O53238	Rv2989	Rv2989	Probabletranscriptionalregulatoryprotein	18
Regulatory proteins	L4_L5	Cluster 123	-4.02894	P9WP49	csoR	Rv0967	Copper-sensingtranscriptionalrepressorCsoR	6
conserved hypotheticals	L4_L5	Cluster 123	-3.92271	P9WL03	Rv0313	Rv0313	UncharacterizedproteinRv0313	8
conserved hypotheticals	L4_L5	Cluster 123	-3.91839	O53749	Rv0464c	Rv0464c	Conservedprotein	12
intermediary metabolism and respiration	L4_L5	Cluster 123	-3.85673	O05458	mycP2	Rv3886c	Mycosin-2	13
	L4_L5	Cluster 123	-3.85169	P9WG53	tilS		tRNA(Ile)-lysidinesynthase	13
intermediary metabolism and respiration	L4_L5	Cluster 123	-3.55621	P9WHU1	prcA	Rv2109c	Proteasomesubunitalpha	14
intermediary metabolism and respiration	L4_L5	Cluster 123	-3.5216	P9WG41	ilvB1	Rv3003c	AcetolactatesynthaselargesubunitIlvB1	35
intermediary metabolism and respiration	L4_L5	Cluster 121	-153.588	O07717	aceAb	Rv1916	PutativeisocitratelyasesubunitB	29	Cluster 121 (N= 22)
conserved hypotheticals	L4_L5	Cluster 121	-138.442	O07748	Rv1883c	Rv1883c	Uncharacterizedprotein	6
intermediary metabolism and respiration	L4_L5	Cluster 121	-92.0618	O07718	aceAa	Rv1915	PutativeisocitratelyasesubunitA	26
intermediary metabolism and respiration	L4_L5	Cluster 121	-38.0689	P95146	Rv1869c	Rv1869c	Probablereductase	24
intermediary metabolism and respiration	L4_L5	Cluster 121	-24.2301	Q79FJ2	gnd1	Rv1844c	6-phosphogluconatedehydrogenase,decarboxylating	18
intermediary metabolism and respiration	L4_L5	Cluster 121	-12.4998	O69692	Rv3725	Rv3725	Possibleoxidoreductase	11
cell wall and cell processes	L4_L5	Cluster 121	-12.1281	P9WQK5	Rv0073	Rv0073	UncharacterizedABCtransporterATP-bindingproteinRv0073	12
intermediary metabolism and respiration	L4_L5	Cluster 121	-10.787	P71552	Rv0958	Rv0958	Possiblemagnesiumchelatase	20
intermediary metabolism and respiration	L4_L5	Cluster 121	-9.73506	O53667	Rv0245	Rv0245	Possibleoxidoreductase	8
intermediary metabolism and respiration	L4_L5	Cluster 121	-8.42099	O53547	Rv3502c	Rv3502c	Probableshort-chaintypedehydrogenase/reductase.Possible17-beta-hydroxysteroiddehydrogenase	11
intermediary metabolism and respiration	L4_L5	Cluster 121	-8.3336	I6YEB6	Rv2766c	Rv2766c	Probableshort-chaintypedehydrogenase/reductase	16
intermediary metabolism and respiration	L4_L5	Cluster 121	-7.57555	O06813	opcA	Rv1446c	PutativeOXPPcycleproteinOpcA	20
virulence, detoxification and adaptation	L4_L5	Cluster 121	-7.45826	O53673	hsp	Rv0251c	HeatshockproteinHsp(Heat-stress-inducedribosome-bindingproteinA)	12
intermediary metabolism and respiration	L4_L5	Cluster 121	-7.12006	P9WGR7	Rv0945	Rv0945	UncharacterizedoxidoreductaseRv0945	12
cell wall and cell processes	L4_L5	Cluster 121	-6.16457	O06342	Rv3479	Rv3479	UncharacterizedmembraneproteinRv3479	51
cell wall and cell processes	L4_L5	Cluster 121	-6.11821	P9WLQ7	Rv1841c	Rv1841c	UncharacterizedproteinRv1841c	10
cell wall and cell processes	L4_L5	Cluster 121	-5.17813	I6XER9	Rv2617c	Rv2617c	Probabletransmembraneprotein	6
intermediary metabolism and respiration	L4_L5	Cluster 121	-4.86382	P9WNY1	Rv0458	Rv0458	Probablealdehydedehydrogenase	26
conserved hypotheticals	L4_L5	Cluster 121	-4.79616	O53494	Rv2052c	Rv2052c	Conservedprotein	15
Regulatory proteins	L4_L5	Cluster 121	-4.71877	O53720	Rv0386	Rv0386	Probabletranscriptionalregulatoryprotein(ProbablyLuxR/UhpA-family)	38
intermediary metabolism and respiration	L4_L5	Cluster 121	-4.16247	O86374	pmmA	Rv3257c	ProbablephosphomannomutasePmmA(PMM)(Phosphomannosemutase)	17
information pathways	L4_L5	Cluster 121	-3.83419	P9WH73	nrdF1	Rv1981c	Ribonucleoside-diphosphatereductasesubunitbetanrdF1	16
