# Supplementary material for: Lineage-Specific Proteomic Signatures in the Mycobacterium tuberculosis Complex Reveal Differential Abundance of Proteins Involved in Virulence, DNA Repair, CRISPR-Cas, Bioenergetics and Lipid Metabolism
Source: Front Microbiol. 2020 Sep 22;11:550760. doi: 10.3389/fmicb.2020.550760 (PMC7536270; doi:10.3389/fmicb.2020.550760)
Supplement: FILE S11 — List of the 539 differentially abundant proteins based on ANOVA analysis. The DA protein groups were further subjected to unsupervised hierarchical cluster analysis resulting in eight clustered protein groups. [file Data_Sheet_11.xlsx]

## Sheet: Cluster information _ANOVA
Functional category	Cluster	Number of protein per each cluster	Protein Ids	Gene Ids	RV number	Protein name	Peptides
intermediary metabolism and respiration	Cluster 511	56	P9WP55	cysK1	Rv2334	O-acetylserinesulfhydrylase	16
conserved hypotheticals	Cluster 511		P95147	Rv1868	Rv1868	Uncharacterizedprotein	18
lipid metabolism	Cluster 511		Q10896	nrp	Rv0101	ProbablepeptidesynthetaseNrp(Peptidesynthase)	22					B
intermediary metabolism and respiration	Cluster 511		P9WGG3	cobB	Rv2848c	NAD-dependentproteindeacylase	7
information pathways	Cluster 511		P9WH75	nrdE	Rv3051c	Ribonucleoside-diphosphatereductasesubunitalpha	37	Summary of ANOVA test significant proteins by functional category according to the Tuberculist database.
lipid metabolism	Cluster 511		O33229	fadE20	Rv2724c	Probableacyl-CoAdehydrogenaseFadE20	10	Note: A total of 494 proteins out of the 539 significant were assigned to one of the protein functional category.
conserved hypotheticals	Cluster 511		I6Y1I1	Rv2695	Rv2695	Conservedhypotheticalalaninerichprotein	6
lipid metabolism	Cluster 511		P9WPW3	scoB	Rv2503c	Probablesuccinyl-CoA:3-ketoacidcoenzymeAtransferasesubunitB	9
PE/PPE families	Cluster 511		P9WI05	PPE32	Rv1808	UncharacterizedPPEfamilyproteinPPE32	5
cell wall and cell processes	Cluster 511		P9WJV7	mmpL2	Rv0507	ProbabletransportproteinMmpL2	14
cell wall and cell processes	Cluster 511		P9WNI7	esxO	Rv2346c	ESAT-6-likeproteinEsxO	5
intermediary metabolism and respiration	Cluster 511		P9WQ31	Rv1319c	Rv1319c	UncharacterizedproteinRv1319c	13
cell wall and cell processes	Cluster 511		P9WNK7	esxA	Rv3875	6kDaearlysecretoryantigenictarget	6
cell wall and cell processes	Cluster 511		O53962	Rv1920	Rv1920	Probablemembraneprotein	12
	Cluster 511		P9WPJ7	mtcA1		Beta-carbonicanhydrase1	14
	Cluster 511		P9WNM9	Rv0120c		ElongationfactorG-likeprotein	41
lipid metabolism	Cluster 511		O07169	fadD7	Rv0119	Probablefatty-acid-CoAligaseFadD7(Fatty-acid-CoAsynthetase)(Fatty-acid-CoAsynthase)	19
	Cluster 511		A0A089QRB9	msl3		Mycolipanoatesynthase	91
intermediary metabolism and respiration	Cluster 511		P71662	Rv1393c	Rv1393c	Probablemonoxygenase	20
lipid metabolism	Cluster 511		P9WQH9	accD3	Rv0904c	Putativeacetyl-coenzymeAcarboxylasecarboxyltransferasesubunitbeta	15
intermediary metabolism and respiration	Cluster 511		P9WJR5	moaC3	Rv3324c	Cyclicpyranopterinmonophosphatesynthase3	13
conserved hypotheticals	Cluster 511		P9WL59	Rv2633c	Rv2633c	UncharacterizedproteinRv2633c	11
intermediary metabolism and respiration	Cluster 511		P95290	lipD	Rv1923	ProbablelipaseLipD	17
conserved hypotheticals	Cluster 511		O53978	Rv1977	Rv1977	Conservedprotein	19
cell wall and cell processes	Cluster 511		P9WJE7	eccE2	Rv3885c	ESX-2secretionsystemproteinEccE2	18
	Cluster 511		P71635	csm6		CRISPR-associatedproteinCsm6	24
intermediary metabolism and respiration	Cluster 511		P9WFS1	deoA	Rv3314c	Thymidinephosphorylase	14
cell wall and cell processes	Cluster 511		O69637	Rv3669	Rv3669	Probableconservedtransmembraneprotein	7
intermediary metabolism and respiration	Cluster 511		P9WKN5	Rv0953c	Rv0953c	UncharacterizedproteinRv0953c	17	Cluster 511 (N= 56)
intermediary metabolism and respiration	Cluster 511		P9WLW9	Rv1498c	Rv1498c	UncharacterizedproteinRv1498c	14
intermediary metabolism and respiration	Cluster 511		P72041	lipE	Rv3775	ProbablelipaseLipE	25
intermediary metabolism and respiration	Cluster 511		O53613	Rv0068	Rv0068	Probableoxidoreductase	21
Regulatory proteins	Cluster 511		O53532	Rv2258c	Rv2258c	Possibletranscriptionalregulatoryprotein	15
lipid metabolism	Cluster 511		P9WHN9	php	Rv0230c	Phosphotriesterasehomologyprotein	11
intermediary metabolism and respiration	Cluster 511		P9WIL5	panC	Rv3602c	Pantothenatesynthetase	13
intermediary metabolism and respiration	Cluster 511		O53369	sdhD	Rv3317	Probablesuccinatedehydrogenase(Hydrophobicmembraneanchorsubunit)SdhD(Succinicdehydrogenase)(Fumaratereductase)(Fumaratedehydrogenase)(Fumarichydrogenase)	5
cell wall and cell processes	Cluster 511		P9WKR7	Rv0875c	Rv0875c	UncharacterizedproteinRv0875c	7
intermediary metabolism and respiration	Cluster 511		O05898	manA	Rv3255c	Probablemannose-6-phosphateisomeraseManA	13
	Cluster 511		P9WHP5	Rv2744c		35kDaprotein	25
intermediary metabolism and respiration	Cluster 511		P9WMU9	Rv1264	Rv1264	pH-sensitiveadenylatecyclaseRv1264	16
lipid metabolism	Cluster 511		P9WPW5	scoA	Rv2504c	Probablesuccinyl-CoA:3-ketoacidcoenzymeAtransferasesubunitA	11
lipid metabolism	Cluster 511		P96404	echA1	Rv0222	Probableenoyl-CoAhydrataseEchA1(Enoylhydrase)(Unsaturatedacyl-CoAhydratase)(Crotonase)	13
virulence, detoxification and adaptation	Cluster 511		P9WMJ7	htpG	Rv2299c	ChaperoneproteinHtpG	41
lipid metabolism	Cluster 511		O53422	fadA3	Rv1074c	Probablebeta-ketoacylCoAthiolaseFadA3	24
intermediary metabolism and respiration	Cluster 511		O53371	sdhB	Rv3319	Probablesuccinatedehydrogenase(Iron-sulphurproteinsubunit)SdhB(Succinicdehydrogenase)(Fumaratereductase)(Fumaratedehydrogenase)(Fumarichydrogenase)	13
cell wall and cell processes	Cluster 511		I6X7X3	lpqG	Rv3623	ProbableconservedlipoproteinLpqG	9
conserved hypotheticals	Cluster 511		O50398	Rv3369	Rv3369	Conservedprotein	5
intermediary metabolism and respiration	Cluster 511		Q6MWY3	moaX	Rv3323c	Molybdopterinsynthasesulfurcarriersubunit	12
intermediary metabolism and respiration	Cluster 511		P9WPD5	gltA2	Rv0896	Citratesynthase1	30
conserved hypotheticals	Cluster 511		O53404	Rv1056	Rv1056	Conservedprotein	15
intermediary metabolism and respiration	Cluster 511		P9WNW7	hsaC	Rv3568c	Iron-dependentextradioldioxygenase	24
intermediary metabolism and respiration	Cluster 511		O53370	sdhA	Rv3318	Succinatedehydrogenaseflavoproteinsubunit	23
	Cluster 511		P9WI93	Rv1159.1		Putativepterin-4-alpha-carbinolaminedehydratase	9
intermediary metabolism and respiration	Cluster 511		P95059	atsA	Rv0711	PossiblearylsulfataseAtsA(Aryl-sulfatesulphohydrolase)(Arylsulphatase)	20
	Cluster 511		P9WIH3	pckG		Phosphoenolpyruvatecarboxykinase[GTP]	37
conserved hypotheticals	Cluster 511		I6XY36	Rv1498A	Rv1498A	Conservedprotein	4
conserved hypotheticals	Cluster 529	52	P9WLM1	Rv2030c	Rv2030c	UncharacterizedproteinRv2030c	25
virulence, detoxification and adaptation	Cluster 529		P9WLN1	Rv2005c	Rv2005c	UniversalstressproteinRv2005c	8	Cluster 529 (N=52)
virulence, detoxification and adaptation	Cluster 529		O53673	hsp	Rv0251c	HeatshockproteinHsp(Heat-stress-inducedribosome-bindingproteinA)	12
intermediary metabolism and respiration	Cluster 529		P95146	Rv1869c	Rv1869c	Probablereductase	24
intermediary metabolism and respiration	Cluster 529		O69692	Rv3725	Rv3725	Possibleoxidoreductase	11
conserved hypotheticals	Cluster 529		O53494	Rv2052c	Rv2052c	Conservedprotein	15
intermediary metabolism and respiration	Cluster 529		O53620	Rv0075	Rv0075	Probableaminotransferase	18
intermediary metabolism and respiration	Cluster 529		O07717	aceAb	Rv1916	PutativeisocitratelyasesubunitB	29
intermediary metabolism and respiration	Cluster 529		O07718	aceAa	Rv1915	PutativeisocitratelyasesubunitA	26
intermediary metabolism and respiration	Cluster 529		P9WIQ3	fprA	Rv3106	NADPH-ferredoxinreductaseFprA	23
intermediary metabolism and respiration	Cluster 529		P9WGR7	Rv0945	Rv0945	UncharacterizedoxidoreductaseRv0945	12
cell wall and cell processes	Cluster 529		P9WQK5	Rv0073	Rv0073	UncharacterizedABCtransporterATP-bindingproteinRv0073	12
cell wall and cell processes	Cluster 529		P9WLQ7	Rv1841c	Rv1841c	UncharacterizedproteinRv1841c	10
intermediary metabolism and respiration	Cluster 529		O53667	Rv0245	Rv0245	Possibleoxidoreductase	8
intermediary metabolism and respiration	Cluster 529		O86374	pmmA	Rv3257c	ProbablephosphomannomutasePmmA(PMM)(Phosphomannosemutase)	17
intermediary metabolism and respiration	Cluster 529		O06813	opcA	Rv1446c	PutativeOXPPcycleproteinOpcA	20
intermediary metabolism and respiration	Cluster 529		Q79FJ2	gnd1	Rv1844c	6-phosphogluconatedehydrogenase,decarboxylating	18
intermediary metabolism and respiration	Cluster 529		I6YEB6	Rv2766c	Rv2766c	Probableshort-chaintypedehydrogenase/reductase	16
conserved hypotheticals	Cluster 529		O07748	Rv1883c	Rv1883c	Uncharacterizedprotein	6
intermediary metabolism and respiration	Cluster 529		P71552	Rv0958	Rv0958	Possiblemagnesiumchelatase	20
conserved hypotheticals	Cluster 529		I6Y9E8	Rv2475c	Rv2475c	Conservedprotein	5
lipid metabolism	Cluster 529		O86319	fadE13	Rv0975c	Probableacyl-CoAdehydrogenaseFadE13	9
conserved hypotheticals	Cluster 529		P9WKN1	Rv0959	Rv0959	UncharacterizedproteinRv0959	14
cell wall and cell processes	Cluster 529		I6XER9	Rv2617c	Rv2617c	Probabletransmembraneprotein	6
Unknown	Cluster 529		P9WLW3	Rv1509	Rv1509	UncharacterizedproteinRv1509	14
intermediary metabolism and respiration	Cluster 529		I6WZ71	serA2	Rv0728c	PossibleD-3-phosphoglyceratedehydrogenaseSerA2(Phosphoglyceratedehydrogenase)(PGDH)	10
conserved hypotheticals	Cluster 529		O06799	Rv1766	Rv1766	Conservedprotein	6
	Cluster 529		P9WIA3	Rv2368c		PhoH-likeprotein	10
cell wall and cell processes	Cluster 529		P9WQL7	Rv2688c	Rv2688c	FluoroquinolonesexportATP-bindingproteinRv2688c	13
cell wall and cell processes	Cluster 529		P9WFP3	Rv1842c	Rv1842c	UPF0053proteinRv1842c	10
intermediary metabolism and respiration	Cluster 529		P9WHS7	pepE	Rv2089c	ProbabledipeptidasePepE	8
information pathways	Cluster 529		P9WH73	nrdF1	Rv1981c	Ribonucleoside-diphosphatereductasesubunitbetanrdF1	16
conserved hypotheticals	Cluster 529		P9WP11	Rv1558	Rv1558	F420H(2)-dependentquinonereductaseRv1558	12
cell wall and cell processes	Cluster 529		O33332	ltp1	Rv2790c	Probablelipid-transferproteinLtp1	15
intermediary metabolism and respiration	Cluster 529		O06574	gnd2	Rv1122	Probable6-phosphogluconatedehydrogenase,decarboxylatingGnd2	18
cell wall and cell processes	Cluster 529		I6Y1H7	Rv2690c	Rv2690c	Probableconservedintegralmembranealanineandvalineandleucinerichprotein	12
lipid metabolism	Cluster 529		I6XFA9	fadE21	Rv2789c	Probableacyl-CoAdehydrogenaseFadE21	20
cell wall and cell processes	Cluster 529		O06342	Rv3479	Rv3479	UncharacterizedmembraneproteinRv3479	51
conserved hypotheticals	Cluster 529		P9WL63	Rv2629	Rv2629	UncharacterizedproteinRv2629	16
intermediary metabolism and respiration	Cluster 529		I6Y4U4	Rv0794c	Rv0794c	Probableoxidoreductase	27
	Cluster 529		P71629	cas10		CRISPR-associatedproteinCas10/Csm1	47
cell wall and cell processes	Cluster 529		P9WIP9	hbhA	Rv0475	Heparin-bindinghemagglutinin	17
conserved hypotheticals	Cluster 529		V5QPR5	Rv0530A	Rv0530A	Conservedprotein	2
lipid metabolism	Cluster 529		P9WKB3	Rv2484c	Rv2484c	PutativediacyglycerolO-acyltransferaseRv2484c	20
lipid metabolism	Cluster 529		O50402	echA18	Rv3373	Probableenoyl-CoAhydrataseEchA18(Enoylhydrase)(Unsaturatedacyl-CoAhydratase)(Crotonase)	9
conserved hypotheticals	Cluster 529		O07738	Rv1894c	Rv1894c	Uncharacterizedprotein	13
cell wall and cell processes	Cluster 529		P9WFL5	Rv0064	Rv0064	UPF0182proteinRv0064	18
intermediary metabolism and respiration	Cluster 529		P9WN73	zwf2	Rv1447c	Glucose-6-phosphate1-dehydrogenase2	23
intermediary metabolism and respiration	Cluster 529		P9WNY1	Rv0458	Rv0458	Probablealdehydedehydrogenase	26
intermediary metabolism and respiration	Cluster 529		O53639	oxcA	Rv0118c	Probableoxalyl-CoAdecarboxylaseOxcA	23
lipid metabolism	Cluster 529		P9WQG3	fadE12	Rv0972c	Acyl-CoAdehydrogenasefadE12	15
lipid metabolism	Cluster 529		P96886	accE5	Rv3281	Probablebifunctionalproteinacetyl-/propionyl-coenzymeAcarboxylase(Epsilonchain)AccE5	7
conserved hypotheticals	Cluster 519	9	P9WFM7	Rv2908c	Rv2908c	UPF0109proteinRv2908c	7
information pathways	Cluster 519		O33361	Rv0516c	Rv0516c	Possibleanti-anti-sigmafactor	6
intermediary metabolism and respiration	Cluster 519		I6XES4	Rv2622	Rv2622	Possiblemethyltransferase(Methylase)	14
Regulatory proteins	Cluster 519		O53720	Rv0386	Rv0386	Probabletranscriptionalregulatoryprotein(ProbablyLuxR/UhpA-family)	38
conserved hypotheticals	Cluster 519		P9WFP7	Rv1461	Rv1461	UPF0051proteinRv1461	27
virulence, detoxification and adaptation	Cluster 519		P9WK09	mymT	Rv0186A	Metallothionein	4
cell wall and cell processes	Cluster 519		I6YCQ7	Rv3675	Rv3675	Possiblemembraneprotein	6
cell wall and cell processes	Cluster 519		P9WFP1	Rv2366c	Rv2366c	UPF0053proteinRv2366c	9
cell wall and cell processes	Cluster 519		O07432	Rv0188	Rv0188	Probableconservedtransmembraneprotein	2
conserved hypotheticals	Cluster 528	124	I6YGE4	Rv3528c	Rv3528c	Uncharacterizedprotein	15
conserved hypotheticals	Cluster 528		P95215	Rv0258c	Rv0258c	Uncharacterizedprotein	5
Regulatory proteins	Cluster 528		P9WN31	glnB	Rv2919c	NitrogenregulatoryproteinP-II	11
Regulatory proteins	Cluster 528		P71699	Rv0042c	Rv0042c	Possibletranscriptionalregulatoryprotein(ProbablyMarR-family)	13	Cluster 528 (N=124)
conserved hypotheticals	Cluster 528		O53979	Rv1978	Rv1978	Conservedprotein	18
conserved hypotheticals	Cluster 528		O53836	Rv0825c	Rv0825c	Conservedprotein	15
Regulatory proteins	Cluster 528		P9WMC9	Rv1816	Rv1816	UncharacterizedHTH-typetranscriptionalregulatorRv1816	11
conserved hypotheticals	Cluster 528		P71741	Rv2402	Rv2402	Trehalase	31
intermediary metabolism and respiration	Cluster 528		P9WIC5	Rv2949c	Rv2949c	Chorismatepyruvate-lyase	10
lipid metabolism	Cluster 528		P96414	fadE4	Rv0231	Probableacyl-CoAdehydrogenaseFadE4	29
intermediary metabolism and respiration	Cluster 528		O53622	Rv0077c	Rv0077c	Probableoxidoreductase	15
lipid metabolism	Cluster 528		O53561	echA19	Rv3516	Possibleenoyl-CoAhydrataseEchA19(Enoylhydrase)(Unsaturatedacyl-CoAhydratase)(Crotonase)	12
information pathways	Cluster 528		P9WQ11	nth	Rv3674c	EndonucleaseIII	17
intermediary metabolism and respiration	Cluster 528		P9WNX7	gabD2	Rv1731	Putativesuccinate-semialdehydedehydrogenase[NADP(+)]2	27
intermediary metabolism and respiration	Cluster 528		P9WMW1	glgP	Rv1328	Glycogenphosphorylase	43
	Cluster 528		P9WG37	kdc		Alpha-keto-aciddecarboxylase	25
conserved hypotheticals	Cluster 528		P9WKP3	Rv0906	Rv0906	UncharacterizedproteinRv0906	17
conserved hypotheticals	Cluster 528		O07196	Rv2694c	Rv2694c	Conservedprotein	9
conserved hypotheticals	Cluster 528		P95287	Rv1927	Rv1927	Uncharacterizedprotein	10
cell wall and cell processes	Cluster 528		O05450	eccC2	Rv3894c	ESXconservedcomponentEccC2.ESX-2typeVIIsecretionsystemprotein.Possiblemembraneprotein	44
lipid metabolism	Cluster 528		P9WQ45	fadD25	Rv1521	Putativefatty-acid--CoAligasefadD25	27
lipid metabolism	Cluster 528		O50417	acrA1	Rv3391	Possiblemulti-functionalenzymewithacyl-CoA-reductaseactivityAcrA1	16
intermediary metabolism and respiration	Cluster 528		P9WN91	frdA	Rv1552	Fumaratereductaseflavoproteinsubunit	20
Regulatory proteins	Cluster 528		P9WGK1	dosT	Rv2027c	HypoxiasensorhistidinekinaseresponseregulatorDosT	30
	Cluster 528		P9WN15	Rv2006		UncharacterizedglycosylhydrolaseRv2006	37
cell wall and cell processes	Cluster 528		P9WJB9	espL	Rv3880c	ESX-1secretion-associatedproteinEspL	8
conserved hypotheticals	Cluster 528		P9WL61	Rv2632c	Rv2632c	UncharacterizedproteinRv2632c	5
PE/PPE families	Cluster 528		I6YG87	PE31	Rv3477	PEfamilyproteinPE31	4
conserved hypotheticals	Cluster 528		O07751	Rv1879	Rv1879	Uncharacterizedprotein	9
intermediary metabolism and respiration	Cluster 528		P9WGI9	glyA1	Rv1093	Serinehydroxymethyltransferase1	24
cell wall and cell processes	Cluster 528		P9WNR7	eccB1	Rv3869	ESX-1secretionsystemATPaseEccB1	21
intermediary metabolism and respiration	Cluster 528		P9WH09	rmlD	Rv3266c	dTDP-4-dehydrorhamnosereductase	13
conserved hypotheticals	Cluster 528		P71784	Rv1505c	Rv1505c	Uncharacterizedprotein	10
intermediary metabolism and respiration	Cluster 528		P9WID7	pfkA	Rv3010c	ATP-dependent6-phosphofructokinase	13
conserved hypotheticals	Cluster 528		P9WML1	Rv1262c	Rv1262c	UncharacterizedHIT-likeproteinRv1262c	8
conserved hypotheticals	Cluster 528		P71794	Rv1515c	Rv1515c	Uncharacterizedprotein	13
Regulatory proteins	Cluster 528		L7N6A2	Rv0275c	Rv0275c	Possibletranscriptionalregulatoryprotein(PossiblyTetR-family)	12
cell wall and cell processes	Cluster 528		O69726	Rv3760	Rv3760	UncharacterizedmembraneproteinRv3760	2
virulence, detoxification and adaptation	Cluster 528		P9WMJ3	virS	Rv3082c	HTH-typetranscriptionalregulatorVirS	11
cell wall and cell processes	Cluster 528		O05883	Rv3238c	Rv3238c	Probableconservedintegralmembraneprotein	4
intermediary metabolism and respiration	Cluster 528		P96847	aspB	Rv3565	Aminotransferase	13
conserved hypotheticals	Cluster 528		O53905	Rv1531	Rv1531	Conservedprotein	8
cell wall and cell processes	Cluster 528		L0TB61	Rv2037c	Rv2037c	Conservedtransmembraneprotein	12
lipid metabolism	Cluster 528		Q10782	Rv1544	Rv1544	Possibleketoacylreductase	17
conserved hypotheticals	Cluster 528		O06592	Rv1598c	Rv1598c	Conservedprotein	12
cell wall and cell processes	Cluster 528		P9WJD7	espC	Rv3615c	ESX-1secretion-associatedproteinEspC	6
conserved hypotheticals	Cluster 528		I6Y8U3	Rv0807	Rv0807	Uncharacterizedprotein	9
cell wall and cell processes	Cluster 528		P9WJE1	espA	Rv3616c	ESX-1secretion-associatedproteinEspA	14
cell wall and cell processes	Cluster 528		O06583	Rv1132	Rv1132	Conservedmembraneprotein	9
conserved hypotheticals	Cluster 528		O50435	Rv1179c	Rv1179c	Uncharacterizedprotein	41
	Cluster 528		P9WPQ9	bfr		Bacterioferritin	14
cell wall and cell processes	Cluster 528		O06827	Rv1431	Rv1431	Conservedmembraneprotein	19
cell wall and cell processes	Cluster 528		P9WJD5	espD	Rv3614c	ESX-1secretion-associatedproteinEspD	9
Regulatory proteins	Cluster 528		P9WGK3	devS	Rv3132c	RedoxsensorhistidinekinaseresponseregulatorDevS	14
conserved hypotheticals	Cluster 528		P96877	Rv3272	Rv3272	Uncharacterizedprotein	16
information pathways	Cluster 528		P9WH05	deaD	Rv1253	ATP-dependentRNAhelicaseDeaD	17
cell wall and cell processes	Cluster 528		Q6MX43	secE2	Rv0379	Calciumdodecin	10
conserved hypotheticals	Cluster 528		O06418	Rv0552	Rv0552	Conservedprotein	17
Regulatory proteins	Cluster 528		P9WMF9	devR	Rv3133c	TranscriptionalregulatoryproteinDevR(DosR)	13
lipid metabolism	Cluster 528		P9WQ51	fadD19	Rv3515c	Long-chain-fatty-acid--CoA/3-oxocholest-4-en-26-oate--CoAligase	31
intermediary metabolism and respiration	Cluster 528		I6Y3S9	Rv3530c	Rv3530c	Possibleoxidoreductase	12
lipid metabolism	Cluster 528		O07721	fadB5	Rv1912c	PossibleoxidoreductaseFadB5	17
lipid metabolism	Cluster 528		P9WNN7	echA12	Rv1472	Probableenoyl-CoAhydrataseechA12	14
conserved hypotheticals	Cluster 528		P9WMA1	Rv0025	Rv0025	UncharacterizedproteinRv0025	9
lipid metabolism	Cluster 528		I6YA03	echA15	Rv2679	Probableenoyl-CoAhydrataseEchA15(Enoylhydrase)(Unsaturatedacyl-CoAhydratase)(Crotonase)	13
cell wall and cell processes	Cluster 528		P96265	lpqM	Rv0419	PossiblelipoproteinpeptidaseLpqM	21
conserved hypotheticals	Cluster 528		O06194	Rv2619c	Rv2619c	Conservedprotein	5
cell wall and cell processes	Cluster 528		O07747	rpfC	Rv1884c	Resuscitation-promotingfactorRpfC	7
cell wall and cell processes	Cluster 528		I6X811	dppA	Rv3666c	Probableperiplasmicdipeptide-bindinglipoproteinDppA	12
conserved hypotheticals	Cluster 528		P9WHK1	Rv0571c	Rv0571c	PutativephosphoribosyltransferaseRv0571c	14
cell wall and cell processes	Cluster 528		P9WM45	Rv1269c	Rv1269c	ProteinRv1269c	6
conserved hypotheticals	Cluster 528		O86336	Rv0406c	Rv0406c	Betalactamaselikeprotein	9
intermediary metabolism and respiration	Cluster 528		P9WJR3	moaE1	Rv3119	Molybdopterinsynthasecatalyticsubunit1	10
intermediary metabolism and respiration	Cluster 528		O33268	Rv0338c	Rv0338c	Probableiron-sulfur-bindingreductase	41
intermediary metabolism and respiration	Cluster 528		O53498	cobN	Rv2062c	CobalaminbiosynthesisproteinCobN	41
Regulatory proteins	Cluster 528		L7N677	oxyS	Rv0117	OxidativestressresponseregulatoryproteinOxyS	13
conserved hypotheticals	Cluster 528		I6XHG6	Rv3527	Rv3527	Uncharacterizedprotein	7
conserved hypotheticals	Cluster 528		P9WLA3	Rv2558	Rv2558	UncharacterizedproteinRv2558	11
lipid metabolism	Cluster 528		P9WQ37	fadD13	Rv3089	Long-chain-fatty-acid--CoAligaseFadD13	24
intermediary metabolism and respiration	Cluster 528		P9WQ35	cya	Rv1625c	Adenylatecyclase	11
lipid metabolism	Cluster 528		P9WKB1	Rv3087	Rv3087	PutativediacyglycerolO-acyltransferaseRv3087	16
	Cluster 528		P9WPJ1	cas6		CRISPR-associatedendoribonucleaseCas6	17
conserved hypotheticals	Cluster 528		O69700	Rv3733c	Rv3733c	Uncharacterizedprotein	9
information pathways	Cluster 528		P9WHJ1	recD	Rv0629c	RecBCDenzymesubunitRecD	13
conserved hypotheticals	Cluster 528		P9WM49	Rv1265	Rv1265	UncharacterizedproteinRv1265	14
conserved hypotheticals	Cluster 528		P71839	Rv0786c	Rv0786c	Conservedprotein	5
intermediary metabolism and respiration	Cluster 528		P9WIT1	Rv2280	Rv2280	UncharacterizedFAD-linkedoxidoreductaseRv2280	23
conserved hypotheticals	Cluster 528		O53744	Rv0459	Rv0459	Uncharacterizedprotein	7
lipid metabolism	Cluster 528		I6YDI9	plsC	Rv2483c	Uncharacterizedprotein	21
virulence, detoxification and adaptation	Cluster 528		P9WF69	vapC33	Rv1242	RibonucleaseVapC33	8
conserved hypotheticals	Cluster 528		P9WQ27	Rv3031	Rv3031	Probable1,4-alpha-glucanbranchingenzymeRv3031	9
conserved hypotheticals	Cluster 528		P95144	Rv1871c	Rv1871c	Conservedprotein	7
conserved hypotheticals	Cluster 528		O05592	Rv1006	Rv1006	Uncharacterizedprotein	29
intermediary metabolism and respiration	Cluster 528		P71875	kshA	Rv3526	3-ketosteroid-9-alpha-monooxygenase,oxygenasecomponent	16
intermediary metabolism and respiration	Cluster 528		P9WN69	pgi	Rv0946c	Glucose-6-phosphateisomerase	26
intermediary metabolism and respiration	Cluster 528		I6Y9Q3	prpC	Rv1131	2-methylcitratesynthase	17
	Cluster 528		P9WPC7	Rv2667		UncharacterizedproteinRv2667	14
lipid metabolism	Cluster 528		O53926	fadE16	Rv1679	Possibleacyl-CoAdehydrogenaseFadE16	17
	Cluster 528		P9WJF7	csm4		CRISPRtypeIII-associatedRAMPproteinCsm4	11
intermediary metabolism and respiration	Cluster 528		P9WQC1	adhA	Rv1862	ProbablealcoholdehydrogenaseAdhA	14
intermediary metabolism and respiration	Cluster 528		P72050	Rv3784	Rv3784	PossibledTDP-glucose4,6-dehydratase	13
intermediary metabolism and respiration	Cluster 528		I6Y2E2	Rv3049c	Rv3049c	Probablemonooxygenase	27
conserved hypotheticals	Cluster 528		P9WLA5	Rv2557	Rv2557	UncharacterizedproteinRv2557	14
virulence, detoxification and adaptation	Cluster 528		O50456	vapB33	Rv1241	AntitoxinVapB33	9
virulence, detoxification and adaptation	Cluster 528		P9WI99	Rv3168	Rv3168	Putativeaminoglycosidephosphotransferase	17
lipid metabolism	Cluster 528		I6Y8F2	echA4	Rv0673	Possibleenoyl-CoAhydrataseEchA4(Enoylhydrase)(Unsaturatedacyl-CoAhydratase)(Crotonase)	15
intermediary metabolism and respiration	Cluster 528		P9WN27	glnE	Rv2221c	Bifunctionalglutaminesynthetaseadenylyltransferase/adenylyl-removingenzyme	49
Regulatory proteins	Cluster 528		P9WI65	pknK	Rv3080c	Serine/threonine-proteinkinasePknK	53
conserved hypotheticals	Cluster 528		O05882	Rv3237c	Rv3237c	Conservedprotein	13
	Cluster 528		P9WND5	lldD		PutativeL-lactatedehydrogenase	33
conserved hypotheticals	Cluster 528		O33182	Rv1680	Rv1680	Uncharacterizedprotein	20
cell wall and cell processes	Cluster 528		O53925	Rv1678	Rv1678	Probableintegralmembraneprotein	6
	Cluster 528		P9WJF9	csm3		CRISPRtypeIII-associatedRAMPproteinCsm3	10
conserved hypotheticals	Cluster 528		O53319	Rv3169	Rv3169	Conservedprotein	24
Insertion seqs and phages	Cluster 528		O53377	Rv3327	Rv3327	Probabletransposasefusionprotein	14
lipid metabolism	Cluster 528		I6Y4E8	echA5	Rv0675	Probableenoyl-CoAhydrataseEchA5(Enoylhydrase)(Unsaturatedacyl-CoAhydratase)(Crotonase)	13
Regulatory proteins	Cluster 528		O53314	moxR3	Rv3164c	ProbablemethanoldehydrogenasetranscriptionalregulatoryproteinMoxR3	17
intermediary metabolism and respiration	Cluster 528		P9WN89	frdB	Rv1553	Fumaratereductaseiron-sulfursubunit	16
PE/PPE families	Cluster 528		P9WHW9	PPE65	Rv3621c	PPEfamilyimmunomodulatorPPE68	5
lipid metabolism	Cluster 528		P9WKC3	tgs4	Rv3088	ProbablediacyglycerolO-acyltransferaseTgs4	22
lipid metabolism	Cluster 528		P9WGR9	fabG2	Rv1350	UncharacterizedoxidoreductaseRv1350	11
intermediary metabolism and respiration	Cluster 528		O06582	prpD	Rv1130	2-methylcitratedehydratase	27
conserved hypotheticals	Cluster 528		I6X7D4	Rv3463	Rv3463	Conservedprotein	21
	Cluster 528		P9WIR3	cfp32		PutativeglyoxylaseCFP32	7
virulence, detoxification and adaptation	Cluster 523	76	P9WMK1	hspX	Rv2031c	Alpha-crystallin	10
	Cluster 523		P9WFD7	Rv2623		UniversalstressproteinRv2623	10
conserved hypotheticals	Cluster 523		P9WJA3	hrp1	Rv2626c	Hypoxicresponseprotein1	7	Cluster 523 (N= 76)
intermediary metabolism and respiration	Cluster 523		P9WPP1	cyp125	Rv3545c	SteroidC26-monooxygenase	19
lipid metabolism	Cluster 523		P71857	fadE28	Rv3544c	Acyl-CoAdehydrogenaseFadE28	12
intermediary metabolism and respiration	Cluster 523		O53547	Rv3502c	Rv3502c	Probableshort-chaintypedehydrogenase/reductase.Possible17-beta-hydroxysteroiddehydrogenase	11
conserved hypotheticals	Cluster 523		P9WLS3	Rv1738	Rv1738	UncharacterizedproteinRv1738	4
intermediary metabolism and respiration	Cluster 523		O06137	cydC	Rv1620c	Probable'componentlinkedwiththeassemblyofcytochrome'transporttransmembraneATP-bindingproteinABCtransporterCydC	19
	Cluster 523		P9WIN7	mtb12		LowmolecularweightantigenMTB12	4
intermediary metabolism and respiration	Cluster 523		P9WN25	glbN	Rv1542c	Group1truncatedhemoglobinGlbN	7
conserved hypotheticals	Cluster 523		P71925	Rv2423	Rv2423	Uncharacterizedprotein	11
conserved hypotheticals	Cluster 523		I6X9X6	Rv0839	Rv0839	Uncharacterizedprotein	13
intermediary metabolism and respiration	Cluster 523		P9WIM5	Rv2959c	Rv2959c	RhamnosylO-methyltransferase	9
lipid metabolism	Cluster 523		Q6MX39	umaA	Rv0469	S-adenosylmethionine-dependentmethyltransferaseUmaA	23
lipid metabolism	Cluster 523		P9WFH5	Rv3767c	Rv3767c	PutativeS-adenosyl-L-methionine-dependentmethyltransferaseRv3767c	16
cell wall and cell processes	Cluster 523		P71892	rocE	Rv2320c	ProbablecationicaminoacidtransportintegralmembraneproteinRocE	7
virulence, detoxification and adaptation	Cluster 523		P9WLB5	Rv2319c	Rv2319c	UniversalstressproteinRv2319c	15
cell wall and cell processes	Cluster 523		O05456	Rv3888c	Rv3888c	Probableconservedmembraneprotein	25
intermediary metabolism and respiration	Cluster 523		I6XHH5	hsaE	Rv3536c	Probablehydratase	12
intermediary metabolism and respiration	Cluster 523		O06138	cydD	Rv1621c	Probable'componentlinkedwiththeassemblyofcytochrome'transporttransmembraneATP-bindingproteinABCtransporterCydD	19
intermediary metabolism and respiration	Cluster 523		P9WPA7	coaA	Rv1092c	Pantothenatekinase	14
intermediary metabolism and respiration	Cluster 523		P9WHT9	prcB	Rv2110c	Proteasomesubunitbeta	16
intermediary metabolism and respiration	Cluster 523		P9WNK9	era	Rv2364c	GTPaseEra	16
intermediary metabolism and respiration	Cluster 523		P9WHU1	prcA	Rv2109c	Proteasomesubunitalpha	14
lipid metabolism	Cluster 523		I6XHI4	fadA5	Rv3546	Steroid3-ketoacyl-CoAthiolase	10
intermediary metabolism and respiration	Cluster 523		P9WK25	mez	Rv2332	Putativemalateoxidoreductase[NAD]	11
conserved hypotheticals	Cluster 523		I6XHI0	Rv3541c	Rv3541c	Conservedprotein	6
intermediary metabolism and respiration	Cluster 523		P9WNE5	bfrB	Rv3841	FerritinBfrB	13
intermediary metabolism and respiration	Cluster 523		O53671	Rv0249c	Rv0249c	Probablesuccinatedehydrogenase[membraneanchorsubunit](Succinicdehydrogenase)	6
intermediary metabolism and respiration	Cluster 523		P9WNC5	folB	Rv3607c	Dihydroneopterinaldolase	7
lipid metabolism	Cluster 523		O53577	fadE35	Rv3797	Probableacyl-CoAdehydrogenaseFadE35	31
cell wall and cell processes	Cluster 523		P9WK65	lppX	Rv2945c	PutativephthioceroldimycocerosatetransporterLppX	12
intermediary metabolism and respiration	Cluster 523		P9WKJ7	ilvC	Rv3001c	Ketol-acidreductoisomerase(NADP(+))	24
conserved hypotheticals	Cluster 523		O53363	Rv3312c	Rv3312c	Uncharacterizedprotein	11
intermediary metabolism and respiration	Cluster 523		I6Y340	Rv0216	Rv0216	Doublehotdoghydratase	20
intermediary metabolism and respiration	Cluster 523		O05458	mycP2	Rv3886c	Mycosin-2	13
cell wall and cell processes	Cluster 523		P9WPS3	ctpV	Rv0969	Probablecopper-exportingP-typeATPaseV	28
cell wall and cell processes	Cluster 523		P9WPS7	ctpG	Rv1992c	Probablecation-transportingATPaseG	14
virulence, detoxification and adaptation	Cluster 523		P9WHU3	Rv2190c	Rv2190c	ProbableendopeptidaseRv2190c	9
Regulatory proteins	Cluster 523		P71888	Rv2324	Rv2324	Probabletranscriptionalregulatoryprotein(ProbablyAsnC-family)	12
conserved hypotheticals	Cluster 523		P71813	Rv0756c	Rv0756c	Uncharacterizedprotein	11
conserved hypotheticals	Cluster 523		O53260	Rv3013	Rv3013	Conservedprotein	11
conserved hypotheticals	Cluster 523		P9WLA9	Rv2411c	Rv2411c	UncharacterizedproteinRv2411c	25
intermediary metabolism and respiration	Cluster 523		P9WNH3	Rv2715	Rv2715	UncharacterizedproteinRv2715	21
	Cluster 523		O53943	espG5		ESX-5secretion-associatedproteinEspG5	14
PE/PPE families	Cluster 523		P9WHY3	PPE51	Rv3136	UncharacterizedPPEfamilyproteinPPE51	6
cell wall and cell processes	Cluster 523		P9WJE3	eccE5	Rv1797	ESX-5secretionsystemproteinEccE5	17
conserved hypotheticals	Cluster 523		O06800	Rv1767	Rv1767	AlkylhydroperoxidereductaseAhpD	5
lipid metabolism	Cluster 523		P9WQ43	fadD26	Rv2930	Long-chain-fatty-acid--AMPligaseFadD26	33
conserved hypotheticals	Cluster 523		I6X9T8	Rv0791c	Rv0791c	Conservedprotein	14
	Cluster 523		P9WHT5	Rv2782c		UncharacterizedzincproteaseRv2782c	9
intermediary metabolism and respiration	Cluster 523		P9WJJ1	Rv1812c	Rv1812c	NADHdehydrogenase-likeproteinRv1812c	15
intermediary metabolism and respiration	Cluster 523		P9WJJ5	nadD	Rv2421c	Probablenicotinate-nucleotideadenylyltransferase	7
lipid metabolism	Cluster 523		P9WQ57	fadD30	Rv0404	Long-chain-fatty-acid--AMPligaseFadD30	18
intermediary metabolism and respiration	Cluster 523		Q50616	Rv1817	Rv1817	Possibleflavoprotein	8
Regulatory proteins	Cluster 523		O53238	Rv2989	Rv2989	Probabletranscriptionalregulatoryprotein	18
cell wall and cell processes	Cluster 523		P9WNJ3	esxN	Rv1793	ESAT-6-likeproteinEsxN	5
conserved hypotheticals	Cluster 523		P9WKL9	Rv0968	Rv0968	UncharacterizedproteinRv0968	7
conserved hypotheticals	Cluster 523		P9WIL1	Rv2573	Rv2573	Putative2-dehydropantoate2-reductase	13
	Cluster 523		P9WKJ3	ilvH		Putativeacetolactatesynthasesmallsubunit	13
intermediary metabolism and respiration	Cluster 523		P9WG41	ilvB1	Rv3003c	AcetolactatesynthaselargesubunitIlvB1	35
Regulatory proteins	Cluster 523		P9WP49	csoR	Rv0967	Copper-sensingtranscriptionalrepressorCsoR	6
cell wall and cell processes	Cluster 523		O53582	aftB	Rv3805c	Terminalbeta-(1->2)-arabinofuranosyltransferase	13
conserved hypotheticals	Cluster 523		P9WLN9	Rv1998c	Rv1998c	UncharacterizedproteinRv1998c	10
lipid metabolism	Cluster 523		P9WQ53	fadD11	Rv1550	Putativefatty-acid--CoAligasefadD11	21
	Cluster 523		P9WKK7	icl		Isocitratelyase	21
conserved hypotheticals	Cluster 523		O53749	Rv0464c	Rv0464c	Conservedprotein	12
lipid metabolism	Cluster 523		P9WI59	plsB1	Rv1551	PutativeacyltransferaseplsB1	27
intermediary metabolism and respiration	Cluster 523		O53670	Rv0248c	Rv0248c	Probablesuccinatedehydrogenase[iron-sulfursubunit](Succinicdehydrogenase)	42
lipid metabolism	Cluster 523		P96285	pks1	Rv2946c	PutativeinactivephenolphthiocerolsynthesispolyketidesynthasetypeIPks1	47
	Cluster 523		I6WZK7	mmcO		MulticopperoxidaseMmcO	10
intermediary metabolism and respiration	Cluster 523		P95160	ndh	Rv1854c	ProbableNADHdehydrogenaseNdh	12
cell wall and cell processes	Cluster 523		P9WJC9	espG2	Rv3889c	ESX-2secretion-associatedproteinEspG2	8
Regulatory proteins	Cluster 523		P9WMH1	ideR	Rv2711	Iron-dependentrepressorIdeR	15
	Cluster 523		P9WG53	tilS		tRNA(Ile)-lysidinesynthase	13
cell wall and cell processes	Cluster 523		O53846	lpqQ	Rv0835	PossiblelipoproteinLpqQ	9
intermediary metabolism and respiration	Cluster 483	4	I6YGW6	Rv3673c	Rv3673c	Possiblemembrane-anchoredthioredoxin-likeprotein(Thiol-disulfideinterchangerelatedprotein)	6
	Cluster 483		P9WHR5	caeB		CarboxylesteraseB	13
intermediary metabolism and respiration	Cluster 483		P9WIB1	plcC	Rv2349c	PhospholipaseC3	10
intermediary metabolism and respiration	Cluster 483		P9WN29	glnD	Rv2918c	Bifunctionaluridylyltransferase/uridylyl-removingenzyme	15
cell wall and cell processes	Cluster 515	48	P9WNK5	esxB	Rv3874	ESAT-6-likeproteinEsxB	9
cell wall and cell processes	Cluster 515		O33363	Rv0518	Rv0518	Possibleexportedprotein	7
cell wall and cell processes	Cluster 515		P9WNJ7	esxK	Rv1197	ESAT-6-likeproteinEsxK	7
lipid metabolism	Cluster 515		I6Y4Z4	fadD16	Rv0852	Possiblefatty-acid-CoAligaseFadD16(Fatty-acid-CoAsynthetase)(Fatty-acid-CoAsynthase)	7
intermediary metabolism and respiration	Cluster 515		P9WIB9	Rv1885c	Rv1885c	Secretedchorismatemutase	10	Cluster 515 (N=48)
	Cluster 515		P9WP43	Rv1984c		ProbablecutinaseRv1984c	4
intermediary metabolism and respiration	Cluster 515		P9WKE9	gmk	Rv1389	Guanylatekinase	15
intermediary metabolism and respiration	Cluster 515		O06216	Rv2161c	Rv2161c	Conservedprotein	26
	Cluster 515		P9WP59	mftE		PutativemycofactocinsystemcreatinineamidohydrolasefamilyproteinMftE	8
conserved hypotheticals	Cluster 515		O06218	Rv2159c	Rv2159c	AlkylhydroperoxidereductaseAhpD	26
cell wall and cell processes	Cluster 515		P9WJL3	murE	Rv2158c	UDP-N-acetylmuramoyl-L-alanyl-D-glutamate--2,6-diaminopimelateligase	31
virulence, detoxification and adaptation	Cluster 515		O07414	mce1B	Rv0170	Mce-familyproteinMce1B	25
cell wall and cell processes	Cluster 515		O50416	lpqD	Rv3390	ProbableconservedlipoproteinLpqD	10
cell wall and cell processes	Cluster 515		P9WJL5	murD	Rv2155c	UDP-N-acetylmuramoylalanine--D-glutamateligase	15
cell wall and cell processes	Cluster 515		O07417	lprK	Rv0173	PossibleMce-familylipoproteinLprK(Mce-familylipoproteinMce1E)	24
virulence, detoxification and adaptation	Cluster 515		Q79FZ9	mce1A	Rv0169	Mce-familyproteinMce1A	21
cell wall and cell processes	Cluster 515		P9WJL1	murF	Rv2157c	UDP-N-acetylmuramoyl-tripeptide--D-alanyl-D-alanineligase	24
virulence, detoxification and adaptation	Cluster 515		O07412	yrbE1A	Rv0167	ConservedintegralmembraneproteinYrbE1A	6
	Cluster 515		P9WMX1	mftF		PutativemycofactocinbiosynthesisglycosyltransferaseMftF	14
lipid metabolism	Cluster 515		O07411	fadD5	Rv0166	Probablefatty-acid-CoAligaseFadD5(Fatty-acid-CoAsynthetase)(Fatty-acid-CoAsynthase)	23
cell wall and cell processes	Cluster 515		O53527	Rv2253	Rv2253	Uncharacterizedprotein	8
cell wall and cell processes	Cluster 515		P9WP41	cut2	Rv2301	Probablecutinasecut2	4
cell wall and cell processes	Cluster 515		P71965	Rv2668	Rv2668	Possibleexportedalanineandvalinerichprotein	8
virulence, detoxification and adaptation	Cluster 515		O53168	ripA	Rv1477	PeptidoglycanendopeptidaseRipA	10
virulence, detoxification and adaptation	Cluster 515		L0T2W6	mce1F	Rv0174	Mce-familyproteinMce1F	23
virulence, detoxification and adaptation	Cluster 515		L0T2Q9	yrbE1B	Rv0168	ConservedintegralmembraneproteinYrbE1B	5
	Cluster 515		P9WNM5	cysNC		BifunctionalenzymeCysN/CysC	23
intermediary metabolism and respiration	Cluster 515		O86346	Rv0939	Rv0939	Possiblebifunctionalenzyme:2-hydroxyhepta-2,4-diene-1,7-dioateisomerase(HHDDisomerase)+cyclase/dehydrase	16
Regulatory proteins	Cluster 515		P9WGM5	narL	Rv0844c	ProbabletranscriptionalregulatoryproteinNarL	10
lipid metabolism	Cluster 515		O50431	fadH	Rv1175c	ProbableNADPHdependent2,4-dienoyl-CoAreductaseFadH(2,4-dienoylcoenzymeAreductase)(4-enoyl-CoAreductase)	40
cell wall and cell processes	Cluster 515		P9WJ99	iniA	Rv0342	Isoniazid-inducedproteinIniA	25
lipid metabolism	Cluster 515		I6Y7V6	fadD31	Rv1925	Probableacyl-CoAligaseFadD31(Acyl-CoAsynthetase)(Acyl-CoAsynthase)	34
PE/PPE families	Cluster 515		P9WIH1	PE15	Rv1386	PEfamilyimmunomodulatorPE15	3
cell wall and cell processes	Cluster 515		P9WJ95	iniC	Rv0343	Isoniazid-inducedproteinIniC	32
virulence, detoxification and adaptation	Cluster 515		O06624	Rv1566c	Rv1566c	PossibleInvprotein	7
cell wall and cell processes	Cluster 515		O07236	Rv0309	Rv0309	Possibleconservedexportedprotein	7
intermediary metabolism and respiration	Cluster 515		P9WJQ3	narG	Rv1161	Nitratereductasealphasubunit	64
virulence, detoxification and adaptation	Cluster 515		P9WLZ1	vapB10	Rv1398c	PutativeantitoxinVapB10	7
cell wall and cell processes	Cluster 515		O53692	esxG	Rv0287	ESAT-6-likeproteinEsxG	3
virulence, detoxification and adaptation	Cluster 515		P9WFA7	vapC10	Rv1397c	RibonucleaseVapC10	6
intermediary metabolism and respiration	Cluster 515		O50406	Rv3377c	Rv3377c	TypeBditerpenecyclase	7
virulence, detoxification and adaptation	Cluster 515		O07416	mce1D	Rv0172	Mce-familyproteinMce1D	23
PE/PPE families	Cluster 515		P9WHZ9	PPE38	Rv2352c	UncharacterizedPPEfamilyproteinPPE38	3
intermediary metabolism and respiration	Cluster 515		O07230	Rv0303	Rv0303	Probabledehydrogenase/reductase	17
intermediary metabolism and respiration	Cluster 515		O06561	narJ	Rv1163	Probablerespiratorynitratereductase(Deltachain)NarJ	9
lipid metabolism	Cluster 515		O06542	echA10	Rv1142c	Probableenoyl-CoAhydrataseEchA10(Enoylhydrase)(Unsaturatedacyl-CoAhydratase)(Crotonase)	10
conserved hypotheticals	Cluster 515		P71923	Rv2425c	Rv2425c	Uncharacterizedprotein	5
lipid metabolism	Cluster 515		I6X8D2	pks13	Rv3800c	PolyketidesynthasePks13	101
Regulatory proteins	Cluster 530	170	P9WKV1	Rv0485	Rv0485	TranscriptionalregulatorRv0485	10	Cluster 530 (N=170)
cell wall and cell processes	Cluster 530		P9WL69	Rv2599	Rv2599	UncharacterizedproteinRv2599	5
intermediary metabolism and respiration	Cluster 530		P9WNE7	fdxA	Rv2007c	Ferredoxin	5
lipid metabolism	Cluster 530		P9WQ49	fadD21	Rv1185c	Putativefatty-acid--CoAligaseFadD21	17
cell wall and cell processes	Cluster 530		P9WJT5	mmpS1	Rv0403c	ProbabletransportaccessoryproteinMmpS1	2
intermediary metabolism and respiration	Cluster 530		P9WNE9	Rv3230c	Rv3230c	NADPHoxidoreductase	13
PE/PPE families	Cluster 530		P9WIF1	PE_PGRS35	Rv1983	UncharacterizedPE-PGRSfamilyproteinPE	5
cell wall and cell processes	Cluster 530		P9WPR9	Rv1488	Rv1488	UncharacterizedproteinRv1488	22
cell wall and cell processes	Cluster 530		O07423	lprO	Rv0179c	PossiblelipoproteinLprO	10
Regulatory proteins	Cluster 530		P9WI77	pknE	Rv1743	Serine/threonine-proteinkinasePknE	17
	Cluster 530		I6YD99	Rv2386A		UncharacterizedproteinRv2386A/RVBD	4
	Cluster 530		P9WHU5	ripB		PeptidoglycanendopeptidaseRipB	9
intermediary metabolism and respiration	Cluster 530		P9WMV7	Rv0492c	Rv0492c	UncharacterizedGMC-typeoxidoreductaseRv0492c	18
intermediary metabolism and respiration	Cluster 530		P9WQG7	Rv0802c	Rv0802c	Putativesuccinyl-CoAtransferaseRv0802c	10
conserved hypotheticals	Cluster 530		I6XEI5	Rv2525c	Rv2525c	PutativepeptidoglycanhydrolaseRv2525c	14
lipid metabolism	Cluster 530		O06541	echA11	Rv1141c	Probableenoyl-CoAhydrataseEchA11(Enoylhydrase)(Unsaturatedacyl-CoAhydratase)(Crotonase)	10
lipid metabolism	Cluster 530		O53521	fadD15	Rv2187	Long-chain-fatty-acid--CoAligaseFadD15	37
intermediary metabolism and respiration	Cluster 530		P9WPD3	citA	Rv0889c	Putativecitratesynthase2	17
cell wall and cell processes	Cluster 530		P9WJC1	espK	Rv3879c	ESX-1secretion-associatedproteinEspK	25
conserved hypotheticals	Cluster 530		O86340	Rv2061c	Rv2061c	Conservedprotein	12
conserved hypotheticals	Cluster 530		P71922	Rv2426c	Rv2426c	Uncharacterizedprotein	17
lipid metabolism	Cluster 530		I6X4S7	tesB2	Rv2605c	Probableacyl-CoAthioesteraseIITesB2(TEII)	12
	Cluster 530		P9WK35	ribE		Riboflavinsynthase	11
conserved hypotheticals	Cluster 530		P9WIY9	Rv1063c	Rv1063c	UncharacterizedNTEfamilyproteinRv1063c	13
virulence, detoxification and adaptation	Cluster 530		P9WG35	tpx	Rv1932	Probablethiolperoxidase	9
intermediary metabolism and respiration	Cluster 530		P9WIN3	Rv2952	Rv2952	Phthiotriol/phenolphthiotrioldimycocerosatesmethyltransferase	20
cell wall and cell processes	Cluster 530		P9WNQ3	eccD3	Rv0290	ESX-3secretionsystemproteinEccD3	9
intermediary metabolism and respiration	Cluster 530		O53695	mycP3	Rv0291	Mycosin-3	12
cell wall and cell processes	Cluster 530		P9WIN9	mpt64	Rv1980c	ImmunogenicproteinMPT64	11
intermediary metabolism and respiration	Cluster 530		P96816	Rv0139	Rv0139	Possibleoxidoreductase	20
cell wall and cell processes	Cluster 530		P9WPI3	eccA3	Rv0282	ESX-3secretionsystemproteinEccA3	39
cell wall and cell processes	Cluster 530		P9WNR3	eccB3	Rv0283	ESX-3secretionsystemATPaseEccB3	28
cell wall and cell processes	Cluster 530		P9WJE5	eccE3	Rv0292	ESX-3secretionsystemproteinEccE3	18
cell wall and cell processes	Cluster 530		P9WNA9	eccC3	Rv0284	ESX-3secretionsystemproteinEccC3	76
conserved hypotheticals	Cluster 530		P9WM91	Rv0036c	Rv0036c	UncharacterizedproteinRv0036c	19
cell wall and cell processes	Cluster 530		P9WK47	lprF	Rv1368	PutativediacylatedglycolipidtransporterLprF	12
lipid metabolism	Cluster 530		O69687	Rv3720	Rv3720	ProbablefattyacidmethyltransferaseRv3720	21
lipid metabolism	Cluster 530		P0CH91	mmaA3	Rv0643c	MethoxymycolicacidsynthaseMmaA3	20
information pathways	Cluster 530		P9WFC5	uvrC	Rv1420	UvrABCsystemproteinC	17
	Cluster 530		P9WGX3	Rv1407		PutativemethyltransferaseRv1407	13
Regulatory proteins	Cluster 530		P9WI75	pknF	Rv1746	Serine/threonine-proteinkinasePknF	15
intermediary metabolism and respiration	Cluster 530		O65931	atsB	Rv3299c	ProbablearylsulfataseAtsB(Aryl-sulfatesulphohydrolase)(Sulfatase)	31
conserved hypotheticals	Cluster 530		P9WP05	Rv2417c	Rv2417c	DegVdomain-containingproteinRv2417c	10
Regulatory proteins	Cluster 530		P9WMG9	Rv0043c	Rv0043c	UncharacterizedHTH-typetranscriptionalregulatorRv0043c	10
virulence, detoxification and adaptation	Cluster 530		P9WHS5	htpX	Rv0563	ProteaseHtpXhomolog	8
conserved hypotheticals	Cluster 530		O07428	Rv0184	Rv0184	Uncharacterizedprotein	10
conserved hypotheticals	Cluster 530		O06380	Rv3627c	Rv3627c	Conservedprotein	17
lipid metabolism	Cluster 530		P9WMV9	choD	Rv3409c	Cholesteroloxidase	23
	Cluster 530		P9WQK9	pstB2		PhosphateimportATP-bindingproteinPstB2	15
intermediary metabolism and respiration	Cluster 530		O06392	Rv0526	Rv0526	Possiblethioredoxinprotein(Thiol-disulfideinterchangeprotein)	7
information pathways	Cluster 530		P9WH07	ksgA	Rv1010	RibosomalRNAsmallsubunitmethyltransferaseA	14
intermediary metabolism and respiration	Cluster 530		Q50584	Rv1523	Rv1523	Probablemethyltransferase	15
cell wall and cell processes	Cluster 530		P9WGU1	pstS1	Rv0934	Phosphate-bindingproteinPstS1	12
conserved hypotheticals	Cluster 530		I6YEA3	Rv2751	Rv2751	S-adenosyl-L-methionine-dependentmethyltransferase	19
cell wall and cell processes	Cluster 530		P9WGT9	pstS2	Rv0932c	Phosphate-bindingproteinPstS2	13
intermediary metabolism and respiration	Cluster 530		P9WJM7	mshD	Rv0819	Mycothiolacetyltransferase	16
information pathways	Cluster 530		P9WHJ3	recA	Rv2737c	ProteinRecA	18
conserved hypotheticals	Cluster 530		O06391	Rv0525	Rv0525	UncharacterizedproteinRv0525	12
	Cluster 530		P71725	octT		Diglucosylglycerateoctanoyltransferase	10
intermediary metabolism and respiration	Cluster 530		P71668	lipI	Rv1400c	ProbablelipaseLipH	10
lipid metabolism	Cluster 530		O53901	pks5	Rv1527c	Mycocerosicacidsynthase-likepolyketidesynthase	91
conserved hypotheticals	Cluster 530		O05582	Rv0999	Rv0999	Uncharacterizedprotein	12
intermediary metabolism and respiration	Cluster 530		P9WNC9	folP2	Rv1207	Inactivedihydropteroatesynthase2	12
information pathways	Cluster 530		P9WGW3	ruvA	Rv2593c	HollidayjunctionATP-dependentDNAhelicaseRuvA	11
cell wall and cell processes	Cluster 530		P9WN95	ftsZ	Rv2150c	CelldivisionproteinFtsZ	16
conserved hypotheticals	Cluster 530		P9WIH5	Rv2047c	Rv2047c	UncharacterizedproteinRv2047c	28
conserved hypotheticals	Cluster 530		I6X5U4	Rv2954c	Rv2954c	Uncharacterizedprotein	14
cell wall and cell processes	Cluster 530		P9WG55	tig	Rv2462c	Triggerfactor	28
cell wall and cell processes	Cluster 530		P9WQK1	Rv0986	Rv0986	UncharacterizedABCtransporterATP-bindingproteinRv0986	12
intermediary metabolism and respiration	Cluster 530		P9WQF5	leuC	Rv2988c	3-isopropylmalatedehydrataselargesubunit	19
	Cluster 530		P9WFJ9	Rv0637		UPF0336proteinRv0637	9
intermediary metabolism and respiration	Cluster 530		P9WPN9	cyp126	Rv0778	PutativecytochromeP450126	14
	Cluster 530		O06401	mtnP		S-methyl-5'-thioadenosinephosphorylase	12
lipid metabolism	Cluster 530		P9WKB5	Rv2285	Rv2285	PutativediacyglycerolO-acyltransferaseRv2285	20
cell wall and cell processes	Cluster 530		I6Y8R4	Rv0774c	Rv0774c	Probableconservedexportedprotein	3
intermediary metabolism and respiration	Cluster 530		P95234	moeW	Rv2338c	PossiblemolybdopterinbiosynthesisproteinMoeW	18
conserved hypotheticals	Cluster 530		O53538	Rv2264c	Rv2264c	Conservedhypotheticalprolinerichprotein	12
	Cluster 530		L7N675	P18		PPEfamilyproteinPPE18	9
PE/PPE families	Cluster 530		P9WI23	PPE20	Rv1387	UncharacterizedPPEfamilyproteinPPE20	6
intermediary metabolism and respiration	Cluster 530		P9WIK1	cysD	Rv1285	Sulfateadenylyltransferasesubunit2	14
cell wall and cell processes	Cluster 530		P9WKL3	Rv0559c	Rv0559c	UncharacterizedproteinRv0559c	3
lipid metabolism	Cluster 530		P9WPF5	pks10	Rv1660	Polyketidesynthase-likePks10	8
cell wall and cell processes	Cluster 530		I6YDV4	Rv2609c	Rv2609c	Probableconservedmembraneprotein	9
	Cluster 530		P9WHS3	rip1		ZincmetalloproteaseRip1	6
conserved hypotheticals	Cluster 530		O53157	Rv1466	Rv1466	Conservedprotein	5
intermediary metabolism and respiration	Cluster 530		P9WPM3	cyp138	Rv0136	PutativecytochromeP450138	18
lipid metabolism	Cluster 530		P9WQE5	ppsB	Rv2932	PhthiocerolsynthesispolyketidesynthasetypeIPpsB	49
lipid metabolism	Cluster 530		O86318	accD2	Rv0974c	Probableacetyl-/propionyl-CoAcarboxylase(Betasubunit)AccD2	14
lipid metabolism	Cluster 530		P9WQE7	ppsA	Rv2931	PhthiocerolsynthesispolyketidesynthasetypeIPpsA	61
cell wall and cell processes	Cluster 530		P9WQL9	drrA	Rv2936	DoxorubicinresistanceATP-bindingproteinDrrA	19
virulence, detoxification and adaptation	Cluster 530		P9WNV7	dnaJ2	Rv2373c	ChaperoneproteinDnaJ2	21
information pathways	Cluster 530		O05855	rhlE	Rv3211	ProbableATP-dependentRNAhelicaseRhlE	18
conserved hypotheticals	Cluster 530		P9WL03	Rv0313	Rv0313	UncharacterizedproteinRv0313	8
lipid metabolism	Cluster 530		P71538	accA2	Rv0973c	Probableacetyl-/propionyl-coenzymeAcarboxylasealphachain(Alphasubunit)AccA2:biotincarboxylase+biotincarboxylcarrierprotein(BCCP)	17
lipid metabolism	Cluster 530		P9WQE3	ppsD	Rv2934	PhthiocerolsynthesispolyketidesynthasetypeIPpsD	61
lipid metabolism	Cluster 530		P95029	fas	Rv2524c	ProbablefattyacidsynthaseFas(Fattyacidsynthetase)	163
lipid metabolism	Cluster 530		P96202	ppsC	Rv2933	PhthiocerolsynthesispolyketidesynthasetypeIPpsC	82
lipid metabolism	Cluster 530		P9WQE1	ppsE	Rv2935	PhthiocerolsynthesispolyketidesynthasetypeIPpsE	75
lipid metabolism	Cluster 530		I6Y231	mas	Rv2940c	Probablemultifunctionalmycocerosicacidsynthasemembrane-associatedMas	112
virulence, detoxification and adaptation	Cluster 530		O06779	mazE2	Rv0660c	ProbableantitoxinMazE2	1
intermediary metabolism and respiration	Cluster 530		P9WJJ9	nadB	Rv1595	L-aspartateoxidase	12
lipid metabolism	Cluster 530		P94996	pks7	Rv1661	ProbablepolyketidesynthasePks7	60
Regulatory proteins	Cluster 530		P9WGK5	senX3	Rv0490	Sensor-likehistidinekinasesenX3	9
cell wall and cell processes	Cluster 530		O33237	Rv2732c	Rv2732c	Probableconservedtransmembraneprotein	5
intermediary metabolism and respiration	Cluster 530		Q6MX34	hemD	Rv0511	Probableuroporphyrin-IIIC-methyltransferaseHemD(UroporphyrinogenIIImethylase)(UrogenIIImethylase)(SUMT)(UrogenIIImethylase)(UROM)	24
conserved hypotheticals	Cluster 530		I6YA17	Rv2699c	Rv2699c	Uncharacterizedprotein	9
cell wall and cell processes	Cluster 530		P96264	lpqL	Rv0418	ProbablelipoproteinaminopeptidaseLpqL	20
intermediary metabolism and respiration	Cluster 530		P9WK95	leuD	Rv2987c	3-isopropylmalatedehydratasesmallsubunit	13
lipid metabolism	Cluster 530		I6Y0L1	mbtE	Rv2380c	PeptidesynthetaseMbtE(Peptidesynthase)	47
lipid metabolism	Cluster 530		P9WQD9	kasA	Rv2245	3-oxoacyl-[acyl-carrier-protein]synthase1	21
lipid metabolism	Cluster 530		P9WK15	mbtK	Rv1347c	LysineN-acyltransferaseMbtK	8
intermediary metabolism and respiration	Cluster 530		P9WQ91	aspC	Rv0337c	Probableaspartateaminotransferase	13
lipid metabolism	Cluster 530		O05819	mbtF	Rv2379c	PeptidesynthetaseMbtF(Peptidesynthase)	33
virulence, detoxification and adaptation	Cluster 530		P9WP75	cspA	Rv3648c	ProbablecoldshockproteinA	5
cell wall and cell processes	Cluster 530		P9WLT5	Rv1591	Rv1591	UncharacterizedproteinRv1591	4
intermediary metabolism and respiration	Cluster 530		P9WN07	Rv1524	Rv1524	UncharacterizedglycosyltransferaseRv1524	7
conserved hypotheticals	Cluster 530		P9WKU5	Rv0495c	Rv0495c	UncharacterizedproteinRv0495c	9
conserved hypotheticals	Cluster 530		O53518	Rv2184c	Rv2184c	Uncharacterizedprotein	8
information pathways	Cluster 530		O06563	typA	Rv1165	PossibleGTP-bindingtranslationelongationfactorTypA(TyrosinephosphorylatedproteinA)(GTP-bindingprotein)	29
cell wall and cell processes	Cluster 530		P9WJV1	mmpL5	Rv0676c	SiderophoreexporterMmpL5	17
intermediary metabolism and respiration	Cluster 530		I6WYY7	hadB	Rv0636	(3R)-hydroxyacyl-ACPdehydratasesubunitHadB	8
	Cluster 530		P9WIY5	nucS		EndonucleaseNucS	11
lipid metabolism	Cluster 530		P9WQE9	pks2	Rv3825c	Phthioceranic/hydroxyphthioceranicacidsynthase	79
cell wall and cell processes	Cluster 530		O53585	glfT2	Rv3808c	GalactofuranosyltransferaseGlfT2	26
lipid metabolism	Cluster 530		P9WQ63	mbtB	Rv2383c	PhenyloxazolinesynthaseMbtB	38
conserved hypotheticals	Cluster 530		O05574	Rv0991c	Rv0991c	Conservedserinerichprotein	4
information pathways	Cluster 530		P9WNT7	dnaE1	Rv1547	DNApolymeraseIIIsubunitalpha	29
lipid metabolism	Cluster 530		P9WG69	fadA4	Rv1323	Probableacetyl-CoAacetyltransferase	20
cell wall and cell processes	Cluster 530		P9WNA3	ftsK	Rv2748c	DNAtranslocaseFtsK	21
conserved hypotheticals	Cluster 530		O53630	Rv0108c	Rv0108c	Uncharacterizedprotein	4
intermediary metabolism and respiration	Cluster 530		O33341	Rv2859c	Rv2859c	PutativeglutamineamidotransferaseRv2859c	7
conserved hypotheticals	Cluster 530		O33198	Rv1697	Rv1697	Uncharacterizedprotein	17
conserved hypotheticals	Cluster 530		P96389	Rv0207c	Rv0207c	Uncharacterizedprotein	12
conserved hypotheticals	Cluster 530		P9WL15	Rv2927c	Rv2927c	UncharacterizedproteinRv2927c	17
conserved hypotheticals	Cluster 530		O86351	Rv1111c	Rv1111c	Uncharacterizedprotein	7
	Cluster 530		P9WN41	glmM		Phosphoglucosaminemutase	18
lipid metabolism	Cluster 530		O53580	fadD32	Rv3801c	Long-chain-fatty-acid--AMPligaseFadD32	36
intermediary metabolism and respiration	Cluster 530		P9WKI1	ino1	Rv0046c	Inositol-3-phosphatesynthase	20
cell wall and cell processes	Cluster 530		O53572	Rv3587c	Rv3587c	Probableconservedmembraneprotein	11
information pathways	Cluster 530		I6YCF3	helZ	Rv2101	ProbablehelicaseHelZ	33
virulence, detoxification and adaptation	Cluster 530		P9WMW3	Rv2581c	Rv2581c	UncharacterizedproteinRv2581c	10
intermediary metabolism and respiration	Cluster 530		P9WP77	fbiC	Rv1173	FOsynthase	16
conserved hypotheticals	Cluster 530		O53751	Rv0466	Rv0466	Conservedprotein	15
lipid metabolism	Cluster 530		P9WQN9	fbpC	Rv0129c	Diacylglycerolacyltransferase/mycolyltransferaseAg85C	11
Insertion seqs and phages	Cluster 530		P9WKH5	Rv0795	Rv0795	InsertionelementIS6110uncharacterized12.0kDaprotein	10
PE/PPE families	Cluster 530		P9WHZ7	PPE40	Rv2356c	UncharacterizedPPEfamilyproteinPPE40	2
cell wall and cell processes	Cluster 530		P9WJK9	murG	Rv2153c	UDP-N-acetylglucosamine--N-acetylmuramyl-(pentapeptide)pyrophosphoryl-undecaprenolN-acetylglucosaminetransferase	20
conserved hypotheticals	Cluster 530		O05796	Rv3120	Rv3120	Uncharacterizedprotein	8
conserved hypotheticals	Cluster 530		I6X579	Rv2728c	Rv2728c	Conservedalaninerichprotein	11
	Cluster 530		L7N653	cwlM		N-acetylmuramoyl-L-alanineamidaseCwlM	17
cell wall and cell processes	Cluster 530		P9WK77	lppJ	Rv2080	PutativelipoproteinLppJ	5
conserved hypotheticals	Cluster 530		L7N6B1	Rv1322A	Rv1322A	Conservedprotein	6
information pathways	Cluster 530		P9WHI3	recR	Rv3715c	RecombinationproteinRecR	10
information pathways	Cluster 530		P9WLZ7	Rv1364c	Rv1364c	UncharacterizedproteinRv1364c	11
virulence, detoxification and adaptation	Cluster 530		O53811	vapB31	Rv0748	AntitoxinVapB31	11
	Cluster 530		P9WMX5	pimF		Putativeglycosyltransferases	6
conserved hypotheticals	Cluster 530		L7N692	Rv1489	Rv1489	Conservedprotein	8
intermediary metabolism and respiration	Cluster 530		P9WJH9	Rv2913c	Rv2913c	UncharacterizedproteinRv2913c	24
virulence, detoxification and adaptation	Cluster 530		P9WQB5	ahpD	Rv2429	AlkylhydroperoxidereductaseAhpD	10
virulence, detoxification and adaptation	Cluster 530		P9WQB7	ahpC	Rv2428	AlkylhydroperoxidereductasesubunitC	15
cell wall and cell processes	Cluster 530		P96419	aftD	Rv0236c	Alpha-(1->3)-arabinofuranosyltransferase	13
lipid metabolism	Cluster 530		P9WNG5	fabD	Rv2243	MalonylCoA-acylcarrierproteintransacylase	12
information pathways	Cluster 530		P9WH71	nrdF2	Rv3048c	Ribonucleoside-diphosphatereductasesubunitbetanrdF2	14
lipid metabolism	Cluster 530		P9WQH5	accD6	Rv2247	Probablepropionyl-CoAcarboxylasebetachain6	34
lipid metabolism	Cluster 530		P9WQD7	kasB	Rv2246	3-oxoacyl-[acyl-carrier-protein]synthase2	26
intermediary metabolism and respiration	Cluster 530		P9WJK1	nadA	Rv1594	QuinolinatesynthaseA	17
cell wall and cell processes	Cluster 530		O53380	dacB1	Rv3330	Probablepenicillin-bindingproteinDacB1(D-alanyl-D-alaninecarboxypeptidase)(DD-peptidase)(DD-carboxypeptidase)(PBP)(DD-transpeptidase)(Serine-typeD-ala-D-alacarboxypeptidase)(D-aminoacid...	11
lipid metabolism	Cluster 530		P9WFI3	Rv0830	Rv0830	PutativeS-adenosyl-L-methionine-dependentmethyltransferaseRv0830	17
information pathways	Cluster 530		P9WGW1	ruvB	Rv2592c	HollidayjunctionATP-dependentDNAhelicaseRuvB	10
intermediary metabolism and respiration	Cluster 530		P9WJJ7	nadC	Rv1596	Nicotinate-nucleotidepyrophosphorylase[carboxylating]	14
